# Supplementary material for: Consumption of Nuts and Seeds and Health Outcomes Including Cardiovascular Disease, Diabetes and Metabolic Disease, Cancer, and Mortality: An Umbrella Review
Source: PubMed Central journal article supplement (PMC9776667; doi:10.1093/advances/nmac077), 2022-08-30
Supplement: nmac077_supplemental_file.pdf [file nmac077_supplemental_file.pdf]

**Consumption of nuts and seeds and health outcomes including cardiovascular, diabetes and metabolic disease, cancer, and mortality: an umbrella review**

Rajiv Balakrishna, Tonje Bjørnerud, Mitra Bemanian, Dagfinn Aune, Lars T. Fadnes\*

**Online Supplementary Material**

\* Corresponding author: Lars Fadnes, email: [Lars.Fadnes@uib.no](mailto:Lars.Fadnes@uib.no), +4755970173, Address: Post box 7804, 5020 Bergen, Norway.

**Supplementary file including the following data:**

**Supplementary table 1:** List of outcome measures from meta-analyses on nut consumption and associations with various morbidities and mortalities (e.g. counting per serving relationship and high/low separately, similarly also for all nuts vs. subtypes of nuts).

**Supplementary table 2:** Assessing the methodological quality of systematic reviews with meta-analysis outcomes on nut consumption and associations to diseases and mortality with overall rating and assessment on sixteen criteria listed below the table.

**Supplementary table 3:** Summary of systematic reviews with meta-analysis on nut consumption and associations to diseases and mortality with information of search year, nut type, outcome, number of studies, unit (high versus low [HL] or per serving/dose expressed in gram per day), relative risk ratios, number of participants and cases, heterogeneity, and overall AMSTAR-2 evaluation.

**Supplementary table 4:** Summary of data on adverse reactions including allergy and anaphylaxis on nut and seed consumption.

**Supplementary figure 1:** Summary of associations from the most recent meta-analyses between high compared to low consumption of nuts and risk of various morbidities and mortalities. Reference number is listed in brackets and search year is listed within the parentheses.

**Supplementary figure 2:** Summary of per serving associations from the most recent meta-analyses between consumption of 28g nuts and risk of various morbidities and mortalities. Reference number is listed in brackets and search year is listed within the parentheses.

**Supplementary figure 3:** Summary of associations from meta-analyses between high compared to low consumption of nuts and risk of various cardiovascular morbidities and mortalities. Reference number is listed in brackets and search year is listed within the parentheses. Number of studies, participants (n) and cases, as well as heterogeneity ( $I^2$ ) is also listed in the right column.

**Supplementary figure 4:** Summary of associations from meta-analyses between per serving relationship of 28g consumption of nuts and risk of various cardiovascular morbidities and mortalities. Reference number is listed in brackets and search year is listed within the parentheses. Number of studies, participants (n) and cases, as well as heterogeneity ( $I^2$ ) is also listed in the right column.

**Supplementary figure 5:** Summary of associations from meta-analyses between high compared to low consumption of nuts and risk of mortality. Reference number is listed in brackets and search year is listed within the parentheses. Number of studies, participants (n) and cases, as well as heterogeneity ( $I^2$ ) is also listed in the right column.

**Supplementary figure 6:** Summary of associations from meta-analyses between per serving relationship of 28g consumption of nuts and risk of mortality. Reference number is listed in brackets and search year is listed within the parentheses. Number of studies, participants (n) and cases, as well as heterogeneity ( $I^2$ ) is also listed in the right column.

**Supplementary figure 7:** Summary of associations from meta-analyses between high compared to low consumption of nuts and risk of cancer and cancer-related mortality. Reference number is listed in brackets and search year is listed within the parentheses. Number of studies, participants (n) and cases, as well as heterogeneity ( $I^2$ ) is also listed in the right column.

**Supplementary figure 8:** Summary of associations from meta-analyses between per serving relationship of 28g consumption of nuts and risk of cancer and cancer-related mortality. Reference number is listed in brackets and search year is listed within the parentheses. Number of studies, participants (n) and cases, as well as heterogeneity ( $I^2$ ) is also listed in the right column.

**Supplementary figure 9:** Summary of associations from meta-analyses between high compared to low consumption of nuts and risk of various diabetes-related morbidities and mortalities. Reference number is listed in brackets and search year is listed within the parentheses. Number of studies, participants (n) and cases, as well as heterogeneity ( $I^2$ ) is also listed in the right column.

**Supplementary figure 10:** Summary of associations from meta-analyses between per serving relationship of 28g consumption of nuts and risk of various diabetes-related morbidities and mortalities. Reference number is listed in brackets and search year is listed within the parentheses. Number of studies, participants (n) and cases, as well as heterogeneity ( $I^2$ ) is also listed in the right column.

**Supplementary figure 11:** Summary of associations from meta-analyses between high compared to low consumption of nuts and risk of various other morbidities and mortalities. Reference number is listed in brackets and search year is listed within the parentheses. Number of studies, participants (n) and cases, as well as heterogeneity ( $I^2$ ) is also listed in the right column.

**Supplementary figure 12:** Summary of associations from meta-analyses between per serving relationship of 28g consumption of nuts and risk of various other morbidities and mortalities. Reference number is listed in brackets and search year is listed within the parentheses. Number of studies, participants (n) and cases, as well as heterogeneity ( $I^2$ ) is also listed in the right column.

**Supplementary figure 13:** Summary of dose-response relationships from meta-analyses on associations between nut consumption of nuts and risk of cardiovascular diseases. The relationships are grouped by meta-analysis (labelled by first author).

**Supplementary figure 14:** Summary of dose-response relationships from meta-analyses on associations between nut consumption of nuts and risk of coronary heart/artery disease. The relationships are grouped by meta-analysis (labelled by first author).

**Supplementary figure 15:** Summary of dose-response relationships from meta-analyses on associations between nut consumption of nuts and risk of stroke diseases. The relationships are grouped by meta-analysis (labelled by first author).

**Supplementary figure 16:** Summary of dose-response relationships from meta-analyses on associations between nut consumption of nuts and risk of diabetes. The relationships are grouped by meta-analysis (labelled by first author).

**Supplementary figure 17:** Summary of dose-response relationships from meta-analyses on associations between nut consumption of nuts and risk of cancer. The relationships are grouped by meta-analysis (labelled by first author).

**Supplementary figure 18:** Summary of dose-response relationships from meta-analyses on associations between nut consumption of nuts and risk of mortality. The relationships are grouped by meta-analysis (labelled by first author).

**Supplementary text 1:** Search documentation for literature search

**Supplementary table 1:** List of outcome measures from meta-analyses on nut consumption and associations with various morbidities and mortalities (e.g. counting dose-relationship and high/low separately, similarly also for all nuts vs. subtypes of nuts).

|                                     |    |
|-------------------------------------|----|
| Atrial fibrillation                 | 1  |
| Coronary heart disease              | 20 |
| Coronary heart disease mortality    | 11 |
| Cardiovascular disease              | 13 |
| Cardiovascular disease mortality    | 13 |
| Cancer mortality                    | 21 |
| Diabetes mellitus                   | 11 |
| Diabetes mortality                  | 6  |
| Heart failure                       | 3  |
| Hemorrhagic stroke incidence        | 4  |
| Infectious disease mortality        | 6  |
| Ischemic stroke incidence           | 4  |
| Kidney disease mortality            | 6  |
| Metabolic syndrome                  | 4  |
| Mortality                           | 19 |
| Neurodegenerative disease mortality | 6  |
| Obesity                             | 1  |
| Overweight or obesity-              | 1  |
| Respiratory disease mortality       | 7  |
| Stroke                              | 20 |
| Stroke mortality                    | 13 |

**Supplementary table 2:** Assessing the methodological quality of systematic reviews with meta-analysis outcomes on nut consumption and associations to diseases and mortality with overall rating and assessment on sixteen criteria listed below the table.

| Reference number | First author  | 1   | 2      | 3   | 4      | 5   | 6   | 7      | 8   | 9   | 10  | 11  | 12  | 13  | 14  | 15  | 16  | Overall Rating |
|------------------|---------------|-----|--------|-----|--------|-----|-----|--------|-----|-----|-----|-----|-----|-----|-----|-----|-----|----------------|
| 37               | Afshin        | Yes | No     | Yes | Yes    | No  | Yes | Partly | Yes | Yes | Yes | Yes | Yes | Yes | Yes | Yes | Yes | Moderate       |
| 16               | Aune          | Yes | Partly | Yes | Yes    | Yes | Yes | Yes    | Yes | Yes | Yes | Yes | Yes | Yes | Yes | Yes | Yes | High           |
| 15               | Becerra-Tomás | Yes | Yes    | Yes | Yes    | Yes | Yes | Partly | Yes | Yes | Yes | Yes | Yes | Yes | Yes | Yes | Yes | High           |
| 38               | Becerra-Tomás | Yes | Yes    | Yes | Yes    | Yes | Yes | Partly | Yes | Yes | Yes | Yes | Yes | Yes | Yes | Yes | Yes | High           |
| 39               | Bechthold     | Yes | Yes    | Yes | Yes    | Yes | Yes | Yes    | Yes | Yes | Yes | Yes | Yes | Yes | Yes | Yes | Yes | High           |
| 40               | Brandt        | Yes | No     | Yes | Partly | No  | No  | No     | No  | Yes | Yes | Yes | No  | Yes | Yes | Yes | Yes | Low            |
| 13               | Chen          | Yes | No     | Yes | Yes    | Yes | Yes | Partly | Yes | Yes | Yes | Yes | Yes | Yes | Yes | Yes | Yes | Moderate       |
| 14               | Grosso        | Yes | No     | Yes | Yes    | Yes | Yes | Partly | Yes | Yes | Yes | Yes | Yes | Yes | Yes | Yes | Yes | Moderate       |
| 41               | Guo           | Yes | No     | Yes | Yes    | Yes | Yes | Partly | Yes | Yes | Yes | Yes | Yes | Yes | Yes | Yes | Yes | Moderate       |
| 42               | Li            | Yes | Partly | Yes | Yes    | Yes | Yes | Yes    | Yes | Yes | Yes | Yes | Yes | Yes | Yes | Yes | Yes | High           |
| 43               | Luo           | Yes | Partly | Yes | Yes    | Yes | Yes | Partly | Yes | Yes | Yes | Yes | Yes | Yes | Yes | Yes | Yes | High           |
| 44               | Ma            | Yes | No     | Yes | Yes    | Yes | Yes | Yes    | Yes | Yes | No  | Yes | No  | Yes | Yes | Yes | Yes | Low            |
| 45               | Mayhew        | Yes | No     | Yes | Yes    | Yes | Yes | Partly | Yes | Yes | Yes | Yes | Yes | Yes | Yes | Yes | Yes | Moderate       |
| 33               | Naghshi       | Yes | Partly | Yes | Yes    | Yes | Yes | Yes    | Yes | Yes | Yes | Yes | Yes | Yes | Yes | Yes | Yes | High           |
| 46               | Schwingshackl | Yes | Yes    | Yes | Yes    | Yes | Yes | Partly | Yes | Yes | Yes | Yes | Yes | Yes | Yes | Yes | Yes | High           |
| 47               | Schwingshackl | Yes | Yes    | Yes | Yes    | Yes | Yes | Partly | Yes | Yes | Yes | Yes | Yes | Yes | Yes | Yes | Yes | High           |
| 48               | Shao          | Yes | Partly | Yes | Yes    | Yes | Yes | Yes    | Yes | Yes | No  | Yes | Yes | Yes | Yes | Yes | Yes | Moderate       |
| 49               | Shi           | Yes | No     | Yes | Yes    | Yes | Yes | Partly | Yes | Yes | Yes | Yes | Yes | Yes | Yes | Yes | Yes | Moderate       |
| 50               | Weng          | Yes | No     | Yes | Yes    | Yes | Yes | Partly | Yes | Yes | Yes | Yes | Yes | Yes | Yes | Yes | Yes | Moderate       |
| 34               | Wu            | Yes | Yes    | Yes | Yes    | Yes | Yes | Partly | Yes | No  | Yes | Yes | No  | No  | Yes | Yes | Yes | Low            |
| 51               | Zhang         | Yes | Partly | Yes | Yes    | Yes | Yes | Yes    | Yes | No  | Yes | Yes | Yes | Yes | Yes | Yes | Yes | Moderate       |
| 35               | Zhang         | Yes | Partly | Yes | Yes    | Yes | Yes | Partly | Yes | Yes | Yes | Yes | Yes | Yes | Yes | Yes | Yes | High           |
| 52               | Zhang         | Yes | No     | Yes | Yes    | Yes | Yes | Partly | Yes | Yes | Yes | Yes | Yes | Yes | Yes | Yes | Yes | Moderate       |

1. PICO (Did the research questions and inclusion criteria for the review include the components of PICO? - Population, Intervention, Comparator group, Outcome)

2. Protocol (Did the report of the review contain an explicit statement that the review methods were established prior to the conduct of the review and did the report justify any significant deviations from the protocol?)
3. Design argued (Did the review authors explain their selection of the study designs for inclusion in the review?)
4. Search and database selection (Did the review authors use a comprehensive literature search strategy?)
5. Duplicate study selection (Did the review authors perform study selection in duplicate?)
6. Duplicate extraction (Did the review authors perform data extraction in duplicate?)
7. Justify exclusion (Did the review authors provide a list of excluded studies and justify the exclusions?)
8. PICO details (Did the review authors describe the included studies in adequate detail?)
9. Bias/confounding (Did the review authors use a satisfactory technique for assessing the risk of bias (RoB) in individual studies that were included in the review?)
10. Funding (Did the review authors report on the sources of funding for the studies included in the review?)
11. If meta-analysis, statistical methods (If meta-analysis was performed did the review authors use appropriate methods for statistical combination of results?)
12. Bias - sensitivity (If meta-analysis was performed, did the review authors assess the potential impact of RoB in individual studies on the results of the meta-analysis or other evidence synthesis?)
13. Bias discussed/accounted (Did the review authors account for RoB in individual studies when interpreting/ discussing the results of the review?)
14. Heterogeneity discussed (Did the review authors provide a satisfactory explanation for, and discussion of, any heterogeneity observed in the results of the review?)
15. Publication bias (If they performed quantitative synthesis did the review authors carry out an adequate investigation of publication bias (small study bias) and discuss its likely impact on the results of the review?)
16. Conflicts of interest (Did the review authors report any potential sources of conflict of interest, including any funding they received for conducting the review?)

**Supplementary table 3:** Summary of systematic reviews with meta-analysis on nut consumption and associations to diseases and mortality with information of search year, nut type, outcome, number of studies, unit (high versus low [HL] or dose response expressed in gram per day), relative risk ratios, number of participants and cases, heterogeneity, and overall AMSTAR-2 evaluation.

| First author | Search year | Ref. no. | Nut types | Outcome                          | Unit | Relative risk ratio (CI) | Participants / cases (studies) | I <sup>2</sup> | AMSTAR-2 |
|--------------|-------------|----------|-----------|----------------------------------|------|--------------------------|--------------------------------|----------------|----------|
| Afshin       | 2013        | 37       | All nuts  | CHD                              | 15g  | 0.78 (0.67-0.92)         | 141390 / 2101 (4)              | 0              | Moderate |
| Afshin       | 2013        | 37       | All nuts  | CHD mortality                    | 15g  | 0.76 (0.69-0.84)         | 206114 / 6749 (4)              | 28             | Moderate |
| Afshin       | 2013        | 37       | All nuts  | Stroke                           | 15g  | 0.89 (0.74-1.05)         | 155685 / 5544 (4)              | 73             | Moderate |
| Afshin       | 2013        | 37       | All nuts  | Diabetes mellitus                | 15g  | 0.87 (0.81-0.94)         | 230216 / 13308 (6)             | 22             | Moderate |
| Aune         | 2016        | 16       | All nuts  | CVD                              | HL   | 0.81 (0.74-0.89)         | 376228 / 18655 (11)            | 52             | High     |
| Aune         | 2016        | 16       | All nuts  | CHD                              | HL   | 0.76 (0.69-0.84)         | 315397 / 12331 (11)            | 48             | High     |
| Aune         | 2016        | 16       | All nuts  | Stroke                           | HL   | 0.89 (0.82-0.97)         | 396768 / 9272 (10)             | 0              | High     |
| Aune         | 2016        | 16       | All nuts  | Mortality                        | HL   | 0.81 (0.77-0.85)         | 819448 / 85870 (15)            | 41             | High     |
| Aune         | 2016        | 16       | All nuts  | Cancer mortality                 | HL   | 0.82 (0.74-0.89)         | 254240 / 17603 (8)             | 28             | High     |
| Aune         | 2016        | 16       | All nuts  | Diabetes mortality               | HL   | 0.68 (0.52-0.9)          | 202751 / 800 (4)               | 0              | High     |
| Aune         | 2016        | 16       | All nuts  | Respiratory disease mortality    | HL   | 0.76 (0.61-0.94)         | 130987 / 2551 (3)              | 54             | High     |
| Aune         | 2016        | 16       | All nuts  | Infectious disease mortality     | HL   | 0.79 (0.56-1.11)         | 118962 / 397 (2)               | 0              | High     |
| Aune         | 2016        | 16       | All nuts  | Kidney disease mortality         | HL   | 0.69 (0.38-1.25)         | 118962 / 367 (2)               | 69             | High     |
| Aune         | 2016        | 16       | All nuts  | Neurodegenerative dis. mortality | HL   | 0.93 (0.72-1.21)         | 130987 / 2056 (3)              | 6              | High     |
| Aune         | 2016        | 16       | Tree nuts | CVD                              | HL   | 0.81 (0.74-0.89)         | 130987 / 9456 (3)              | 0              | High     |
| Aune         | 2016        | 16       | Tree nuts | CHD                              | HL   | 0.79 (0.68-0.92)         | 130987 / 6394 (3)              | 28             | High     |
| Aune         | 2016        | 16       | Tree nuts | Stroke                           | HL   | 0.89 (0.82-0.97)         | 130987 / 2130 (3)              | 0              | High     |
| Aune         | 2016        | 16       | Tree nuts | Mortality                        | HL   | 0.8 (0.74-0.86)          | 202751 / 42508 (4)             | 58             | High     |
| Aune         | 2016        | 16       | Tree nuts | Cancer mortality                 | HL   | 0.82 (0.76-0.9)          | 130987 / 14210 (3)             | 0              | High     |
| Aune         | 2016        | 16       | Tree nuts | Diabetes mortality               | HL   | 1.19 (0.74-1.89)         | 130987 / 462 (3)               | 0              | High     |
| Aune         | 2016        | 16       | Tree nuts | Respiratory disease mortality    | HL   | 0.89 (0.74-1.07)         | 130987 / 2551 (3)              | 0              | High     |
| Aune         | 2016        | 16       | Tree nuts | Infectious disease mortality     | HL   | 0.73 (0.47-1.13)         | 118962 / 397 (2)               | 0              | High     |
| Aune         | 2016        | 16       | Tree nuts | Kidney disease mortality         | HL   | 0.65 (0.4-1.03)          | 118962 / 367 (2)               | 0              | High     |
| Aune         | 2016        | 16       | Tree nuts | Neurodegenerative dis. mortality | HL   | 0.94 (0.75-1.18)         | 130987 / 2056 (3)              | 14             | High     |
| Aune         | 2016        | 16       | Peanuts   | CVD                              | HL   | 0.81 (0.75-0.87)         | 265252 / 12043 (5)             | 15             | High     |
| Aune         | 2016        | 16       | Peanuts   | CHD                              | HL   | 0.76 (0.69-0.82)         | 265252 / 7025 (5)              | 0              | High     |
| Aune         | 2016        | 16       | Peanuts   | Stroke                           | HL   | 0.83 (0.69-1)            | 265252 / 3315 (5)              | 46             | High     |
| Aune         | 2016        | 16       | Peanuts   | Mortality                        | HL   | 0.85 (0.82-0.89)         | 265252 / 44396 (5)             | 18             | High     |
| Aune         | 2016        | 16       | Peanuts   | Cancer mortality                 | HL   | 0.93 (0.87-0.99)         | 265252 / 17742 (5)             | 19             | High     |
| Aune         | 2016        | 16       | Peanuts   | Diabetes mortality               | HL   | 0.84 (0.6-1.19)          | 202751 / 800 (4)               | 43             | High     |
| Aune         | 2016        | 16       | Peanuts   | Respiratory disease mortality    | HL   | 0.77 (0.63-0.93)         | 130987 / 2551 (3)              | 39             | High     |



|               |      |    |           |                                  |     |                  |                     |    |      |
|---------------|------|----|-----------|----------------------------------|-----|------------------|---------------------|----|------|
| Aune          | 2016 | 16 | Peanuts   | Infectious disease mortality     | HL  | 1.01 (0.83-1.23) | 118962 / 397 (2)    | 13 | High |
| Aune          | 2016 | 16 | Peanuts   | Kidney disease mortality         | HL  | 0.52 (0.27-0.97) | 118962 / 367 (2)    | 0  | High |
| Aune          | 2016 | 16 | Peanuts   | Neurodegenerative dis. mortality | HL  | 0.94 (0.72-1.23) | 130987 / 2056 (3)   | 46 | High |
| Aune          | 2016 | 16 | All nuts  | CVD                              | 28g | 0.79 (0.7-0.88)  | 376228 / 18655 (12) | 60 | High |
| Aune          | 2016 | 16 | All nuts  | CHD                              | 28g | 0.71 (0.63-0.8)  | 315397 / 12331 (11) | 47 | High |
| Aune          | 2016 | 16 | All nuts  | Stroke                           | 28g | 0.93 (0.83-1.05) | 396768 / 9272 (11)  | 14 | High |
| Aune          | 2016 | 16 | All nuts  | Mortality                        | 28g | 0.78 (0.72-0.84) | 819448 / 85870 (16) | 66 | High |
| Aune          | 2016 | 16 | All nuts  | Cancer mortality                 | 28g | 0.85 (0.76-0.94) | 254240 / 17603 (8)  | 42 | High |
| Aune          | 2016 | 16 | All nuts  | Diabetes mortality               | 28g | 0.61 (0.43-0.88) | 202751 / 800 (4)    | 0  | High |
| Aune          | 2016 | 16 | All nuts  | Respiratory disease mortality    | 28g | 0.48 (0.26-0.89) | 130987 / 2551 (3)   | 61 | High |
| Aune          | 2016 | 16 | All nuts  | Infectious disease mortality     | 28g | 0.25 (0.07-0.85) | 118962 / 397 (2)    | 54 | High |
| Aune          | 2016 | 16 | All nuts  | Kidney disease mortality         | 28g | 0.27 (0.04-1.91) | 118962 / 367 (2)    | 61 | High |
| Aune          | 2016 | 16 | All nuts  | Neurodegenerative dis. mortality | 28g | 0.65 (0.4-1.08)  | 130987 / 2056 (3)   | 6  | High |
| Aune          | 2016 | 16 | Tree nuts | CVD                              | 28g | 0.75 (0.67-0.84) | 130987 / 9456 (3)   | 0  | High |
| Aune          | 2016 | 16 | Tree nuts | CHD                              | 28g | 0.73 (0.63-0.85) | 130987 / 6394 (3)   | 0  | High |
| Aune          | 2016 | 16 | Tree nuts | Stroke                           | 28g | 0.89 (0.69-1.14) | 130987 / 2130 (3)   | 0  | High |
| Aune          | 2016 | 16 | Tree nuts | Mortality                        | 28g | 0.82 (0.75-0.9)  | 202751 / 42508 (4)  | 70 | High |
| Aune          | 2016 | 16 | Tree nuts | Cancer mortality                 | 28g | 0.8 (0.72-0.89)  | 130987 / 14210 (3)  | 0  | High |
| Aune          | 2016 | 16 | Tree nuts | Diabetes mortality               | 28g | 1.23 (0.68-2.25) | 130987 / 462 (3)    | 0  | High |
| Aune          | 2016 | 16 | Tree nuts | Respiratory disease mortality    | 28g | 0.79 (0.62-1.01) | 130987 / 2551 (3)   | 0  | High |
| Aune          | 2016 | 16 | Tree nuts | Infectious disease mortality     | 28g | 0.64 (0.36-1.13) | 118962 / 397 (2)    | 0  | High |
| Aune          | 2016 | 16 | Tree nuts | Kidney disease mortality         | 28g | 0.66 (0.36-1.22) | 118962 / 367 (2)    | 0  | High |
| Aune          | 2016 | 16 | Tree nuts | Neurodegenerative dis. mortality | 28g | 0.81 (0.58-1.12) | 130987 / 2056 (3)   | 26 | High |
| Aune          | 2016 | 16 | Peanuts   | CVD                              | 28g | 0.64 (0.5-0.81)  | 265252 / 12043 (5)  | 77 | High |
| Aune          | 2016 | 16 | Peanuts   | CHD                              | 28g | 0.69 (0.57-0.84) | 265252 / 7025 (5)   | 45 | High |
| Aune          | 2016 | 16 | Peanuts   | Stroke                           | 28g | 0.63 (0.41-0.95) | 265252 / 3315 (5)   | 78 | High |
| Aune          | 2016 | 16 | Peanuts   | Mortality                        | 28g | 0.77 (0.69-0.86) | 265252 / 44396 (5)  | 64 | High |
| Aune          | 2016 | 16 | Peanuts   | Cancer mortality                 | 28g | 0.92 (0.82-1.03) | 265252 / 17742 (5)  | 30 | High |
| Aune          | 2016 | 16 | Peanuts   | Diabetes mortality               | 28g | 0.73 (0.45-1.2)  | 202751 / 800 (4)    | 15 | High |
| Aune          | 2016 | 16 | Peanuts   | Respiratory disease mortality    | 28g | 0.69 (0.53-0.91) | 130987 / 2551 (3)   | 50 | High |
| Aune          | 2016 | 16 | Peanuts   | Infectious disease mortality     | 28g | 1.03 (0.81-1.31) | 118962 / 397 (2)    | 3  | High |
| Aune          | 2016 | 16 | Peanuts   | Kidney disease mortality         | 28g | 0.42 (0.24-0.73) | 118962 / 367 (2)    | 0  | High |
| Aune          | 2016 | 16 | Peanuts   | Neurodegenerative dis. mortality | 28g | 0.92 (0.65-1.31) | 130987 / 2056 (3)   | 49 | High |
| Becerra-Tomás | 2019 | 38 | All nuts  | CVD                              | HL  | 0.85 (0.8-0.91)  | 210836 / 14136 (3)  | 0  | High |
| Becerra-Tomás | 2019 | 38 | All nuts  | CVD mortality                    | HL  | 0.77 (0.72-0.82) | 413727 / 14475 (14) | 3  | High |
| Becerra-Tomás | 2019 | 38 | All nuts  | CHD                              | HL  | 0.82 (0.69-0.96) | 275812 / 12654 (7)  | 74 | High |
| Becerra-Tomás | 2019 | 38 | All nuts  | CHD mortality                    | HL  | 0.76 (0.67-0.86) | 396041 / 7877 (12)  | 46 | High |

|               |      |    |           |                              |     |                  |                     |    |      |
|---------------|------|----|-----------|------------------------------|-----|------------------|---------------------|----|------|
| Becerra-Tomás | 2019 | 38 | All nuts  | Stroke                       | HL  | 1 (0.92-1.09)    | 302888 / 12646 (7)  | 0  | High |
| Becerra-Tomás | 2019 | 38 | All nuts  | Stroke mortality             | HL  | 0.83 (0.75-0.93) | 351618 / 2332 (11)  | 0  | High |
| Becerra-Tomás | 2019 | 38 | All nuts  | Hemorrhagic stroke incidence | HL  | 1.02 (0.77-1.34) | 188750 / 3088 (5)   | 15 | High |
| Becerra-Tomás | 2019 | 38 | All nuts  | Ischemic stroke incidence    | HL  | 0.99 (0.89-1.1)  | 302423 / 8401 (7)   | 0  | High |
| Becerra-Tomás | 2019 | 38 | All nuts  | Atrial fibrillation          | HL  | 0.85 (0.73-0.99) | 53965 / 10867 (2)   | 0  | High |
| Becerra-Tomás | 2019 | 38 | All nuts  | Heart failure                | HL  | 1 (0.86-1.16)    | 53887 / 4253 (2)    | 0  | High |
| Becerra-Tomás | 2019 | 38 | All nuts  | CVD                          | 28g | 0.87 (0.81-0.93) | 210836 / 14136 (3)  | 0  | High |
| Becerra-Tomás | 2019 | 38 | All nuts  | CVD mortality                | 28g | 0.71 (0.61-0.84) | 413727 / 14475 (14) | 3  | High |
| Becerra-Tomás | 2019 | 38 | All nuts  | CHD                          | 28g | 0.75 (0.64-0.88) | 275812 / 12654 (7)  | 74 | High |
| Becerra-Tomás | 2019 | 38 | All nuts  | CHD mortality                | 28g | 0.67 (0.52-0.87) | 396041 / 7877 (12)  | 46 | High |
| Becerra-Tomás | 2019 | 38 | All nuts  | Stroke                       | 28g | 1.06 (0.97-1.15) | 302888 / 12646 (7)  | 0  | High |
| Becerra-Tomás | 2019 | 38 | All nuts  | Stroke mortality             | 28g | 1.01 (0.88-1.18) | 351618 / 2332 (11)  | 0  | High |
| Becerra-Tomás | 2019 | 38 | All nuts  | Hemorrhagic stroke incidence | 28g | 1.05 (0.77-1.43) | 188750 / 3088 (5)   | 15 | High |
| Becerra-Tomás | 2019 | 38 | All nuts  | Ischemic stroke incidence    | 28g | 1.06 (0.86-1.31) | 302423 / 8401 (7)   | 0  | High |
| Becerra-Tomás | 2019 | 38 | Tree nuts | CVD                          | HL  | 0.85 (0.79-0.91) | 210836 / 14136 (3)  | 0  | High |
| Becerra-Tomás | 2019 | 38 | Tree nuts | CHD                          | HL  | 0.77 (0.7-0.84)  | 210836 / 8390 (3)   | 61 | High |
| Becerra-Tomás | 2019 | 38 | Tree nuts | Stroke                       | HL  | 1 (0.89-1.11)    | 210836 / 5910 (3)   | 0  | High |
| Becerra-Tomás | 2019 | 38 | Tree nuts | Stroke mortality             | HL  | 0.93 (0.77-1.13) | 118962 / 1851 (3)   | 0  | High |
| Becerra-Tomás | 2019 | 38 | Peanuts   | CVD                          | HL  | 0.87 (0.81-0.93) | 210836 / 14136 (3)  | 0  | High |
| Becerra-Tomás | 2019 | 38 | Peanuts   | CVD mortality                | HL  | 0.77 (0.7-0.85)  | 134265 / 5572 (2)   | 0  | High |
| Becerra-Tomás | 2019 | 38 | Peanuts   | CHD                          | HL  | 0.85 (0.79-0.92) | 210836 / 8390 (3)   | 0  | High |
| Becerra-Tomás | 2019 | 38 | Peanuts   | CHD mortality                | HL  | 0.75 (0.64-0.88) | 134265 / 2119 (2)   | 0  | High |
| Becerra-Tomás | 2019 | 38 | Peanuts   | Stroke                       | HL  | 0.9 (0.81-0.99)  | 210836 / 5910 (3)   | 13 | High |
| Becerra-Tomás | 2019 | 38 | Peanuts   | Stroke mortality             | HL  | 0.83 (0.73-0.95) | 253227 / 3036 (4)   | 57 | High |
| Becerra-Tomás | 2019 | 38 | Walnuts   | CVD                          | HL  | 0.81 (0.71-0.92) | 144021 / 5255 (3)   | 3  | High |
| Becerra-Tomás | 2019 | 38 | Walnuts   | CHD                          | HL  | 0.79 (0.66-0.94) | 144021 / 2685 (3)   | 4  | High |
| Becerra-Tomás | 2019 | 38 | Walnuts   | Stroke                       | HL  | 0.85 (0.71-1.02) | 144021 / 5910 (3)   | 19 | High |
| Becerra-Tomás | 2021 | 15 | All nuts  | Diabetes mellitus            | HL  | 1.04 (0.94-1.15) | 194168 / (4)        | 60 | High |
| Becerra-Tomás | 2021 | 15 | Tree nuts | Diabetes mellitus            | HL  | 0.98 (0.87-1.11) | 137956 / (2)        | 0  | High |
| Becerra-Tomás | 2021 | 15 | Walnuts   | Diabetes mellitus            | HL  | 0.76 (0.62-0.94) | 137956 / (1)        | 0  | High |
| Becerra-Tomás | 2021 | 15 | Peanuts   | Diabetes mellitus            | HL  | 0.95 (0.87-1.04) | 202147 / (3)        | 72 | High |
| Bechthold     | 2017 | 39 | All nuts  | CHD                          | HL  | 0.8 (0.62-1.03)  | / 5480 (4)          | 79 | High |
| Bechthold     | 2017 | 39 | All nuts  | Stroke                       | HL  | 0.94 (0.85-1.05) | / 7490 (6)          | 18 | High |
| Bechthold     | 2017 | 39 | All nuts  | Heart failure                | HL  | 0.99 (0.86-1.15) | / 3613 (3)          | 57 | High |
| Bechthold     | 2017 | 39 | All nuts  | CHD                          | 28g | 0.67 (0.43-1.05) | / 5480 (4)          | 85 | High |
| Bechthold     | 2017 | 39 | All nuts  | Stroke                       | 28g | 0.99 (0.84-1.17) | / 7490 (6)          | 45 | High |
| Bechthold     | 2017 | 39 | All nuts  | Heart failure                | 28g | 1.09 (0.97-1.22) | / 3613 (2)          | 0  | High |

|                  |      |    |           |                               |          |                  |                     |    |          |
|------------------|------|----|-----------|-------------------------------|----------|------------------|---------------------|----|----------|
| Brandt (van den) | 2014 | 40 | All nuts  | Cancer mortality              | HL       | 0.85 (0.77-0.93) | 247030 / 14340 (4)  | 17 | Low      |
| Brandt (van den) | 2014 | 40 | All nuts  | Respiratory disease mortality | HL       | 0.71 (0.58-0.86) | 239814 / 2551 (3)   | 5  | Low      |
| Chen             | 2016 | 13 | All nuts  | CVD mortality                 | HL       | 0.75 (0.71-0.79) | 524610 / 19574 (16) | 0  | Moderate |
| Chen             | 2016 | 13 | All nuts  | CHD mortality                 | HL       | 0.73 (0.67-0.8)  | 429833 / 10083 (13) | 14 | Moderate |
| Chen             | 2016 | 13 | All nuts  | Stroke mortality              | HL       | 0.82 (0.73-0.91) | 449293 / 4398 (12)  | 0  | Moderate |
| Chen             | 2016 | 13 | All nuts  | Mortality                     | HL       | 0.81 (0.78-0.84) | 498730 / 66568 (16) | 22 | Moderate |
| Chen             | 2016 | 13 | All nuts  | Cancer mortality              | HL       | 0.87 (0.8-0.93)  | 451589 / 21353 (11) | 26 | Moderate |
| Chen             | 2016 | 13 | Tree nuts | CVD mortality                 | HL       | 0.81 (0.74-0.89) | 130987 / 9456 (3)   | 0  | Moderate |
| Chen             | 2016 | 13 | Tree nuts | CHD mortality                 | HL       | 0.79 (0.68-0.92) | 130987 / 6394 (3)   | 28 | Moderate |
| Chen             | 2016 | 13 | Tree nuts | Stroke mortality              | HL       | 0.93 (0.77-1.13) | 130987 / 2130 (3)   | 0  | Moderate |
| Chen             | 2016 | 13 | Tree nuts | Mortality                     | HL       | 0.83 (0.77-0.89) | 130987 / 36252 (3)  | 0  | Moderate |
| Chen             | 2016 | 13 | Tree nuts | Cancer mortality              | HL       | 0.82 (0.76-0.9)  | 130987 / 14210 (3)  | 0  | Moderate |
| Chen             | 2016 | 13 | Peanuts   | CVD mortality                 | HL       | 0.78 (0.73-0.85) | 265252 / 12052 (5)  | 18 | Moderate |
| Chen             | 2016 | 13 | Peanuts   | CHD mortality                 | HL       | 0.76 (0.69-0.82) | 265252 / 7025 (5)   | 0  | Moderate |
| Chen             | 2016 | 13 | Peanuts   | Stroke mortality              | HL       | 0.83 (0.71-0.97) | 265252 / 3315 (5)   | 46 | Moderate |
| Chen             | 2016 | 13 | Peanuts   | Mortality                     | HL       | 0.85 (0.81-0.89) | 265252 / 44396 (5)  | 34 | Moderate |
| Chen             | 2016 | 13 | Peanuts   | Cancer mortality              | HL       | 0.93 (0.87-0.99) | 265252 / 17742 (5)  | 19 | Moderate |
| Chen             | 2016 | 13 | All nuts  | CVD mortality                 | 28g/week | 0.94 (0.93-0.96) | 509871 / 20362 (16) | 60 | Moderate |
| Chen             | 2016 | 13 | All nuts  | CHD mortality                 | 28g/week | 0.94 (0.93-0.96) | 412892 / 10399 (13) | 34 | Moderate |
| Chen             | 2016 | 13 | All nuts  | Stroke mortality              | 28g/week | 0.95 (0.91-1)    | 432352 / 4831 (12)  | 61 | Moderate |
| Chen             | 2016 | 13 | All nuts  | Mortality                     | 28g/week | 0.96 (0.94-0.97) | 766470 / 81034 (18) | 72 | Moderate |
| Chen             | 2016 | 13 | All nuts  | Cancer mortality              | 28g/week | 0.97 (0.96-0.99) | 434405 / 21302 (10) | 23 | Moderate |
| Chen             | 2016 | 13 | Tree nuts | CVD mortality                 | 28g/week | 0.91 (0.86-0.95) | 130987 / 9456 (3)   | 0  | Moderate |
| Chen             | 2016 | 13 | Tree nuts | CHD mortality                 | 28g/week | 0.89 (0.84-0.95) | 130987 / 6394 (3)   | 15 | Moderate |
| Chen             | 2016 | 13 | Tree nuts | Stroke mortality              | 28g/week | 0.96 (0.87-1.06) | 130987 / 2130 (3)   | 0  | Moderate |
| Chen             | 2016 | 13 | Tree nuts | Mortality                     | 28g/week | 0.91 (0.89-0.94) | 130987 / 36252 (3)  | 0  | Moderate |
| Chen             | 2016 | 13 | Tree nuts | Cancer mortality              | 28g/week | 0.92 (0.88-0.96) | 130987 / 14210 (3)  | 0  | Moderate |
| Chen             | 2016 | 13 | Peanuts   | CVD mortality                 | 28g/week | 0.84 (0.77-0.93) | 265252 / 12052 (5)  | 80 | Moderate |
| Chen             | 2016 | 13 | Peanuts   | CHD mortality                 | 28g/week | 0.87 (0.81-0.95) | 265252 / 7025 (5)   | 53 | Moderate |
| Chen             | 2016 | 13 | Peanuts   | Stroke mortality              | 28g/week | 0.84 (0.73-0.96) | 265252 / 3315 (5)   | 72 | Moderate |
| Chen             | 2016 | 13 | Peanuts   | Mortality                     | 28g/week | 0.91 (0.87-0.95) | 265252 / 44396 (5)  | 64 | Moderate |
| Chen             | 2016 | 13 | Peanuts   | Cancer mortality              | 28g/week | 0.97 (0.93-1.01) | 265252 / 17742 (5)  | 23 | Moderate |
| Grosso           | 2014 | 14 | All nuts  | CVD mortality                 | HL       | 0.71 (0.62-0.81) | 354933 / 7775 (9)   | 25 | Moderate |
| Grosso           | 2014 | 14 | All nuts  | Mortality                     | HL       | 0.77 (0.69-0.87) | 354933 / 44636 (9)  | 56 | Moderate |
| Grosso           | 2014 | 14 | All nuts  | Cancer mortality              | HL       | 0.86 (0.75-0.98) | 354933 / 10423 (9)  | 32 | Moderate |
| Grosso           | 2014 | 14 | All nuts  | CVD mortality                 | 28g      | 0.61 (0.42-0.91) | 354933 / 7775 (9)   | 74 | Moderate |
| Grosso           | 2014 | 14 | All nuts  | Mortality                     | 28g      | 0.73 (0.6-0.88)  | 354933 / 44636 (9)  | 53 | Moderate |

|               |      |    |           |                              |          |                  |                     |    |          |
|---------------|------|----|-----------|------------------------------|----------|------------------|---------------------|----|----------|
| Grosso        | 2014 | 14 | All nuts  | Cancer mortality             | 28g      | 0.69 (0.33-1.45) | 354933 / 10423 (9)  | 70 | Moderate |
| Guo           | 2013 | 41 | All nuts  | Diabetes mellitus            | HL       | 0.98 (0.84-1.15) | 263663 / 11 580 (6) | 68 | Moderate |
| Guo           | 2013 | 41 | All nuts  | Diabetes mellitus            | 28g      | 1.04 (0.95-1.14) | 263663 / 11 580 (6) | 58 | Moderate |
| Li            | 2017 | 42 | All nuts  | Metabolic syndrome           | 28g/week | 0.96 (0.92-0.99) | 20666 / 4625 (6)    | 0  | High     |
| Li            | 2017 | 42 | All nuts  | Overweight or obesity-       | 28g/week | 0.97 (0.95-0.98) | 203591 / 28678 (6)  | 0  | High     |
| Li            | 2017 | 42 | All nuts  | Obesity                      | 28g/week | 0.95 (0.89-1.02) | 178633 / 18557 (6)  | 74 | High     |
| Luo           | 2013 | 43 | All nuts  | CVD                          | 28g      | 0.71 (0.59-0.85) | / 8862 (4)          | 49 | High     |
| Luo           | 2013 | 43 | All nuts  | CHD                          | 28g      | 0.72 (0.64-0.81) | / 6623 (6)          | 0  | High     |
| Luo           | 2013 | 43 | All nuts  | Stroke                       | 28g      | 0.91 (0.81-1.02) | / 6487 (5)          | 20 | High     |
| Luo           | 2013 | 43 | All nuts  | Mortality                    | 28g      | 0.83 (0.76-0.91) | / 48818 (11)        | 62 | High     |
| Luo           | 2013 | 43 | All nuts  | Diabetes mellitus            | 28g      | 0.88 (0.84-0.92) | / 12655 (8)         | 68 | High     |
| Ma            | 2014 | 44 | All nuts  | CHD                          | HL       | 0.66 (0.58-0.75) | 347477 / 6127 (13)  | 40 | Low      |
| Ma            | 2014 | 44 | All nuts  | CHD                          | 28g      | 0.7 (0.58-0.83)  | / 4886 (7)          | 0  | Low      |
| Mayhew        | 2015 | 45 | All nuts  | CVD mortality                | HL       | 0.73 (0.68-0.78) | 243795 / 13726 (5)  | 16 | Moderate |
| Mayhew        | 2015 | 45 | All nuts  | CHD                          | HL       | 0.66 (0.48-0.91) | 123971 / 4757 (3)   | 88 | Moderate |
| Mayhew        | 2015 | 45 | All nuts  | Stroke                       | HL       | 1.05 (0.69-1.61) | 157826 / 4318 (2)   | 77 | Moderate |
| Mayhew        | 2015 | 45 | All nuts  | Stroke mortality             | HL       | 0.83 (0.69-1)    | 159322 / 2166 (3)   | 0  | Moderate |
| Mayhew        | 2015 | 45 | All nuts  | Mortality                    | HL       | 0.81 (0.77-0.85) | 277432 / 49232 (10) | 43 | Moderate |
| Mayhew        | 2015 | 45 | All nuts  | CVD                          | 16g      | 0.72 (0.55-0.96) | 6309 / 634 (1)      | 0  | Moderate |
| Mayhew        | 2015 | 45 | All nuts  | CVD mortality                | 16g      | 0.78 (0.63-1)    | 243795 / 13726 (5)  | 16 | Moderate |
| Mayhew        | 2015 | 45 | All nuts  | CHD mortality                | 16g      | 0.78 (0.57-1.08) | 278584 / 8454 (7)   | 0  | Moderate |
| Mayhew        | 2015 | 45 | All nuts  | Stroke mortality             | 16g      | 0.85 (0.55-1.31) | 159322 / 2166 (3)   | 0  | Moderate |
| Mayhew        | 2015 | 45 | All nuts  | Mortality                    | 16g      | 0.81 (0.75-0.92) | 277432 / 49232 (10) | 43 | Moderate |
| Naghshi       | 2020 | 33 | All nuts  | Cancer mortality             | HL       | 0.87 (0.82-0.91) | 819851 / 48038 (10) | 23 | High     |
| Naghshi       | 2020 | 33 | Tree nuts | Cancer mortality             | HL       | 0.82 (0.76-0.9)  | / (3)               | 0  | High     |
| Naghshi       | 2020 | 33 | Peanuts   | Cancer mortality             | HL       | 0.92 (0.86-0.99) | / (4)               | 34 | High     |
| Naghshi       | 2020 | 33 | All nuts  | Cancer mortality             | 5g       | 0.96 (0.95-0.98) | / (10)              | 30 | High     |
| Naghshi       | 2020 | 33 | Peanuts   | Cancer mortality             | 5g       | 0.97 (0.92-1.02) | / (4)               | 49 | High     |
| Schwingshackl | 2016 | 46 | All nuts  | Mortality                    | HL       | 0.8 (0.74-0.86)  | / 80204 (16)        | 84 | High     |
| Schwingshackl | 2016 | 46 | All nuts  | Mortality                    | 28g      | 0.76 (0.69-0.84) | / 80204 (16)        | 82 | High     |
| Schwingshackl | 2017 | 47 | All nuts  | Diabetes mellitus            | HL       | 0.95 (0.85-1.05) | / 27016 (8)         | 67 | High     |
| Schwingshackl | 2017 | 47 | All nuts  | Diabetes mellitus            | 28g      | 0.89 (0.71-1.12) | / 27016 (8)         | 77 | High     |
| Shao          | 2016 | 48 | All nuts  | Stroke                       | HL       | 0.88 (0.8-0.97)  | / (14)              | 0  | Moderate |
| Shao          | 2016 | 48 | All nuts  | Stroke mortality             | HL       | 0.81 (0.72-0.91) | / ()                | 0  | Moderate |
| Shao          | 2016 | 48 | All nuts  | Stroke                       | 12g      | 0.86 (0.79-0.94) | / (11)              | 0  | Moderate |
| Shi           | 2014 | 49 | All nuts  | Stroke                       | HL       | 0.9 (0.81-0.99)  | 228799 / 5669 (8)   | 0  | Moderate |
| Shi           | 2014 | 49 | All nuts  | Hemorrhagic stroke incidence | HL       | 1.17 (0.54-2.54) | 210472 / 5601 (3)   | 78 | Moderate |

|       |      |    |           |                              |          |                  |                   |    |          |
|-------|------|----|-----------|------------------------------|----------|------------------|-------------------|----|----------|
| Shi   | 2014 | 49 | All nuts  | Ischemic stroke incidence    | HL       | 0.97 (0.84-1.1)  | 210472 / 5601 (3) | 0  | Moderate |
| Weng  | 2014 | 50 | All nuts  | CHD                          | HL       | 0.68 (0.59-0.78) | / 6302 (14)       | 63 | Moderate |
| Weng  | 2014 | 50 | All nuts  | CHD                          | 28g/week | 0.9 (0.87-0.94)  | / 6127 (13)       | 68 | Moderate |
| Wu    | 2013 | 34 | All nuts  | Diabetes mellitus            | HL       | 0.98 (0.84-1.14) | / (5)             | 74 | Low      |
| Zhang | 2018 | 51 | All nuts  | Metabolic syndrome           | HL       | 0.84 (0.76-0.92) | 89224 / (11)      | 79 | Moderate |
| Zhang | 2018 | 51 | Tree nuts | Metabolic syndrome           | HL       | 0.97 (0.94-1)    | / (4)             | 0  | Moderate |
| Zhang | 2018 | 51 | Peanuts   | Metabolic syndrome           | HL       | 1.01 (0.96-1.06) | / (2)             | 0  | Moderate |
| Zhang | 2019 | 35 | All nuts  | Cancer mortality             | HL       | 0.9 (0.88-0.92)  | / 49161 (9)       | 14 | High     |
| Zhang | 2014 | 52 | All nuts  | Stroke                       | HL       | 0.9 (0.83-0.98)  | 476181 / (9)      | 0  | Moderate |
| Zhang | 2014 | 52 | All nuts  | Hemorrhagic stroke incidence | HL       | 1.53 (0.97-2.41) | 194307 / 5454 (2) | 0  | Moderate |
| Zhang | 2014 | 52 | All nuts  | Ischemic stroke incidence    | HL       | 0.9 (0.74-1.09)  | 210472 / 5601 (3) | 0  | Moderate |

\* Abbreviations: CHD: coronary heart disease; CVD: cardiovascular disease

**Table S4:** Summary of data on adverse reactions including allergy and anaphylactic reactions on nut and seed consumption.

| First author and title                                                             | Main outcome                                                  | Search period (end) | Studies (n)                                   | Findings                                                                                                                                                                                                                                                                                                                                                                                                                                                                                                                                                                                                                                                                                                                                                                                                                                                                                                                                                                                                                                                                                                                                                                                                       | Conclusion from the study                                                                                                                                                                                                                                              |
|------------------------------------------------------------------------------------|---------------------------------------------------------------|---------------------|-----------------------------------------------|----------------------------------------------------------------------------------------------------------------------------------------------------------------------------------------------------------------------------------------------------------------------------------------------------------------------------------------------------------------------------------------------------------------------------------------------------------------------------------------------------------------------------------------------------------------------------------------------------------------------------------------------------------------------------------------------------------------------------------------------------------------------------------------------------------------------------------------------------------------------------------------------------------------------------------------------------------------------------------------------------------------------------------------------------------------------------------------------------------------------------------------------------------------------------------------------------------------|------------------------------------------------------------------------------------------------------------------------------------------------------------------------------------------------------------------------------------------------------------------------|
| Conrado. Global patterns in anaphylaxis due to specific foods: A systematic review | Prevalence of anaphylaxis and allergy to peanut and tree nuts | 2020 (Nov)          | 65                                            | <p>The estimated prevalence estimates (in %) among adults were as follows: Peanut allergy: Europe 0.35 (0.20-0.60), North America/Southwest Pacific 1.8 (0.6-1.9), Asia 0.46 (0.36-0.58); Tree nuts: North America/Southwest Pacific 1.2 (1.1-1.3); Cashew nuts: North America/Southwest Pacific 0.5 (0.5-0.6); Hazelnut: Europe 0.86 (0.39-1.90), North America/Southwest Pacific 0.6 (0.5-0.7); Walnut: Europe 0.30 (0.14-0.66), North America/Southwest Pacific 0.6 (0.6-0.7); Sesame: Europe 0.01 (0-1.35), North America/Southwest Pacific 0.2 (0.2-0.3). The estimated prevalence estimates (in %) among children were as follows: Peanut: Europe 0.42 (0.25-0.70), North America/Southwest Pacific 2.60 (2.17-3.11), Asia 0.21 (0.17-0.27); Tree nuts: North America/Southwest Pacific 1.77 (1.26-2.47), Asia 0.12 (0-6.63); Cashew nuts: Europe 0.11 (0-0.62), North America/Southwest Pacific 1.04 (0.59-1.84); Hazelnut: Europe 0.28 (0.10-0.77), North America/Southwest Pacific 0.61 (0.54-0.69); Walnut: Europe 0.12 (0.04-0.41), North America/Southwest Pacific 0.61 (0.54-0.69); Sesame: Europe 0.07 (0.01-0.88), North America/Southwest Pacific 0.21 (0.17-0.25), Asia 0.07 (0.05-0.10).</p> | <p>The estimated prevalence of allergy to different types of nuts varied across geographic regions, as well as between children and adults. Local legislation for allergen disclosure generally reflects those allergens commonly responsible for food anaphylaxis</p> |
| McWilliam. The Prevalence of Tree Nut Allergy: A Systematic Review                 | Tree nut allergy                                              | 2014 (Dec)          | 36 (24 in children, 18 from Europe, 5 in USA) | <p>Challenge-confirmed IgE-mediated tree nut allergy prevalence was less than 2 % (although only seven studies used this gold standard) while probable tree nut allergy prevalence ranged from 0.05-4.9%. Prevalence estimates that included oral allergy syndrome (OAS) reactions to tree nut were significantly higher (8–11.4%) and were predominantly from Europe. Prevalence of individual tree nut allergies varied significantly by region with hazelnut the most common tree nut allergy in Europe, walnut and cashew in the USA and Brazil nut, almond, and walnut most reported in the UK.</p>                                                                                                                                                                                                                                                                                                                                                                                                                                                                                                                                                                                                       | <p>Prevalence of individual tree nut allergies varied significantly by region with hazelnut the most common tree nut allergy in Europe, walnut and cashew in the USA and Brazil nut, almond and walnut most reported in the UK</p>                                     |

|                                                                                             |                                               |            |                          |                                                                                                                                                                                                                                                                                                                                                                                                                                                                                                                                                                                                                                                                                                                                                                                                                                                                                                                                                                                                                                                                                                                                                                                                                                                                                                                                                                                                                         |                                                                                                                                                                                                                                        |
|---------------------------------------------------------------------------------------------|-----------------------------------------------|------------|--------------------------|-------------------------------------------------------------------------------------------------------------------------------------------------------------------------------------------------------------------------------------------------------------------------------------------------------------------------------------------------------------------------------------------------------------------------------------------------------------------------------------------------------------------------------------------------------------------------------------------------------------------------------------------------------------------------------------------------------------------------------------------------------------------------------------------------------------------------------------------------------------------------------------------------------------------------------------------------------------------------------------------------------------------------------------------------------------------------------------------------------------------------------------------------------------------------------------------------------------------------------------------------------------------------------------------------------------------------------------------------------------------------------------------------------------------------|----------------------------------------------------------------------------------------------------------------------------------------------------------------------------------------------------------------------------------------|
| Nwaru. Prevalence of common food allergies in Europe: a systematic review and meta-analysis | Food allergies including peanut and tree nuts | 2012 (Sep) | 50 (42 in meta-analyses) | <p>The overall pooled estimates for all age groups of self-reported lifetime prevalence of allergy to peanut was 0.4% (0.3–0.6) and 1.3% (1.2–1.5) for tree nuts. The prevalence of food-challenge-defined allergy to peanut was 0.2% (0.2–0.3) and correspondingly 0.5% (0.08–0.8) for tree nuts. Significant heterogeneity between the studies. Peanut allergy: The overall lifetime prevalence of self-reported peanut allergy was 0.4% (95% CI 0.3–0.6), 1.7% (95% CI 1.5–1.8) for point self-reported prevalence, 1.7% (95% CI 1.6–1.9) for SPT positivity, 8.6% (95% CI 8.2–9.0) for specific IgE-positivity, 0.2% (95% CI for 0.2–0.3) for FC positivity, and 1.6% (95% CI 1.2–1.9) for FC or history of peanut allergy. In most cases, the estimates were higher in older age groups than in younger children, while the region-stratified estimates were mostly higher in Western Europe than in other regions. The overall lifetime prevalence of self-reported tree nut allergy was 1.3% (95% CI 1.2–1.5), 1.8% (95% CI 1.6–2.0) for point self-reported prevalence, 0.6% (95% CI 0.5–0.7) for SPT positivity, 0.5% (95% CI for 0.08–0.8) for FC positivity, and 0.1% (95% CI 0.1–0.2) for FC or history of tree nut allergy. The estimates were higher in older age groups than in younger children, while the region-stratified estimates were mostly higher in Northern Europe than in other regions.</p> | The lifetime self-reported prevalence of allergy to common foods in Europe ranged from 0.1 to 6.0%. The heterogeneity between studies was high, and participation rates varied across studies reaching as low as <20% in some studies. |
| Patel. Hypersensitivities to sesame and other common edible seeds                           | Hypersensitivities to sesame and other seeds  | 2016 (Mar) |                          | <p>Prevalence of sesame allergy was estimated at 0.1–0.2%. The estimate in United States, through a telephone survey, is 0.1%. In Israel, sesame allergy was reported as the third most common cause of IgE-mediated food reactions and as the second most common cause of food-induced anaphylaxis. Reported cases comprised all ages, including early infancy. In a pediatric series, the median age was 1 year 5. In a study from Saudi Arabia, sesame was the third most common trigger of food-induced anaphylaxis. Study in Italy of 351 adults sensitized to various fruits and vegetable, there were five with systemic symptoms to seeds (sesame and sunflower). Among 1110 adults with food allergy in general, sesame and sunflower were implicated in six cases, including two had anaphylaxis.</p>                                                                                                                                                                                                                                                                                                                                                                                                                                                                                                                                                                                                         | Allergy to sesame was more reported than to other seeds, with an estimated prevalence of 0.1–0.2%.                                                                                                                                     |

|                                                                                                                                                                |                                                                                                                |            |                                                                                                  |                                                                                                                                                                                                                                                                                                                                                                                                                                                                                                                                                                                                                                                                                                                                                                                                                                                                                                                                                                                           |                                                                                                                                                                      |
|----------------------------------------------------------------------------------------------------------------------------------------------------------------|----------------------------------------------------------------------------------------------------------------|------------|--------------------------------------------------------------------------------------------------|-------------------------------------------------------------------------------------------------------------------------------------------------------------------------------------------------------------------------------------------------------------------------------------------------------------------------------------------------------------------------------------------------------------------------------------------------------------------------------------------------------------------------------------------------------------------------------------------------------------------------------------------------------------------------------------------------------------------------------------------------------------------------------------------------------------------------------------------------------------------------------------------------------------------------------------------------------------------------------------------|----------------------------------------------------------------------------------------------------------------------------------------------------------------------|
| Patel. Using data from food challenges to inform management of consumers with food allergy: A systematic review with individual participant data meta-analysis | Food allergies and rate of anaphylaxis to low-level peanut exposure and reproducibility of reaction thresholds | 2020 (Sep) | 19 (3151 participants, 534 underwent further peanut challenge)                                   | <p>At individual participant data meta-analysis, 4.5% (95% CI 1.9% - 10.1%) of individuals reacted to 5 mg or less of peanut protein with anaphylaxis (moderate heterogeneity [I2 = 57%]). Intraindividual thresholds varied. In all, 2.4% (95% CI, 1.1% to 5.0%) of patients initially tolerated 5 mg of peanut protein but then reacted to this dose at subsequent challenge (low heterogeneity [I2 = 16%]); none developed anaphylaxis. In all, 12 studies included an initial challenge dose of 1 mg or less of peanut protein; at meta-analysis, 4.2% (95% CI, 0.7% to 22.3%) of reactions to 1 mg or less of peanut protein would be anaphylaxis (moderate heterogeneity [I2 = 56%]). Because of fewer reactions at this level of allergen exposure, no sensitivity analyses were undertaken. Around 5% of individuals reacting to the eliciting dose of 1.5 mg of peanut protein (5 mg peanut) level of exposure to peanut might develop anaphylaxis in response to that dose.</p> | Among individuals with peanut allergy, 1 to 6 anaphylaxis events are estimated per 2500 patients exposed to low-dose nuts protein                                    |
| Rona. The prevalence of food allergy: A meta-analysis                                                                                                          | Prevalence of food allergies including peanuts                                                                 | 2005 (Dec) | 15 self report), 3 (IgE), 6 (skin prick test), 8 (self report+sensitization), 3 (food challenge) | <p>Self-reported prevalence of food allergy varied from 0% to 2% for peanuts. The prevalence of symptomatic and sensitized (skin prick test or IgE) ranged from 0.5-2.5% for peanuts. Prevalence of IgE sensitization ranges from less than 1% to 6%, equivalent figures for skin prick test were 1% to 6%. The estimated prevalence of allergy based on food challenge varied between 0.4% to 1.6% in different studies (3 studies in total).</p>                                                                                                                                                                                                                                                                                                                                                                                                                                                                                                                                        | There is a marked heterogeneity in the prevalence of food allergy due to differences in study design, methodology, and populations                                   |
| van der Valk. Systematic review on cashew nut allergy                                                                                                          | Cashew nut allergy                                                                                             | 2013 (?)   | 7                                                                                                | <p>0.08% of children under 4 in the United Kingdom were sensitized to cashew nuts. Thirty per cent of the peanut and 74% of the cashew nut sensitized patients developed an anaphylactic reaction after ingestion</p>                                                                                                                                                                                                                                                                                                                                                                                                                                                                                                                                                                                                                                                                                                                                                                     | Among anaphylaxis reactions, cashew nut allergy is a relatively common cause. Avoidance of pistachio nuts must currently be advised in case of a cashew nut allergy. |
| Versluis. Frequency, severity and causes of unexpected allergic reactions to food: a systematic literature review                                              | Food allergies (various)                                                                                       | 2013 (Apr) | 13                                                                                               | <p>Among 530 reactions in Spain, 9% of reactions due to nuts, 32% were anaphylactic (none fatal). US: Registry data from the United States estimating ca. 5 fatalities/year due to nuts (3/4 of these due to peanuts). Severe reaction not uncommon, but life-threatening reactions are rare.</p>                                                                                                                                                                                                                                                                                                                                                                                                                                                                                                                                                                                                                                                                                         | Anaphylaxis reactions are rare, but among these peanuts seems to be leading food allergen                                                                            |



|                                                                       |                                                    |            |                                |                                                                                                                                                                                                                                                                                                                                                             |                                                                                                                                                                                                                                                               |
|-----------------------------------------------------------------------|----------------------------------------------------|------------|--------------------------------|-------------------------------------------------------------------------------------------------------------------------------------------------------------------------------------------------------------------------------------------------------------------------------------------------------------------------------------------------------------|---------------------------------------------------------------------------------------------------------------------------------------------------------------------------------------------------------------------------------------------------------------|
| Zuidmeer. The prevalence of plant food allergies: a systematic review | Prevalence of food allergies to tree nuts/all nuts | 2006 (Dec) | 17 (6 included food challenge) | Prevalence of perceived allergies to tree nuts in following ages as follows: 0-6 years of 0.03% to 0.2%, 6-18 years of 0.2% to 2.3%, and adults of 0.4% to 1.4%. The prevalence of perceived reactions to any nuts ranged from 0% to 7.3%. Only 6 studies included food challenge tests with prevalence of allergy ranging from 0.1% to 4.3% for tree nuts. | Population-based prevalence estimates for allergies to plant products determined by the diagnostic gold standard are scarce. There was considerable heterogeneity in the prevalence estimates of sensitization or perceived allergic reactions to plant food. |
|-----------------------------------------------------------------------|----------------------------------------------------|------------|--------------------------------|-------------------------------------------------------------------------------------------------------------------------------------------------------------------------------------------------------------------------------------------------------------------------------------------------------------------------------------------------------------|---------------------------------------------------------------------------------------------------------------------------------------------------------------------------------------------------------------------------------------------------------------|

**Supplementary figure 1:** Summary of associations from the most recent meta-analyses between high compared to low consumption of nuts and risk of various morbidities and mortalities. Reference number is listed in brackets and search year is listed within the parentheses.

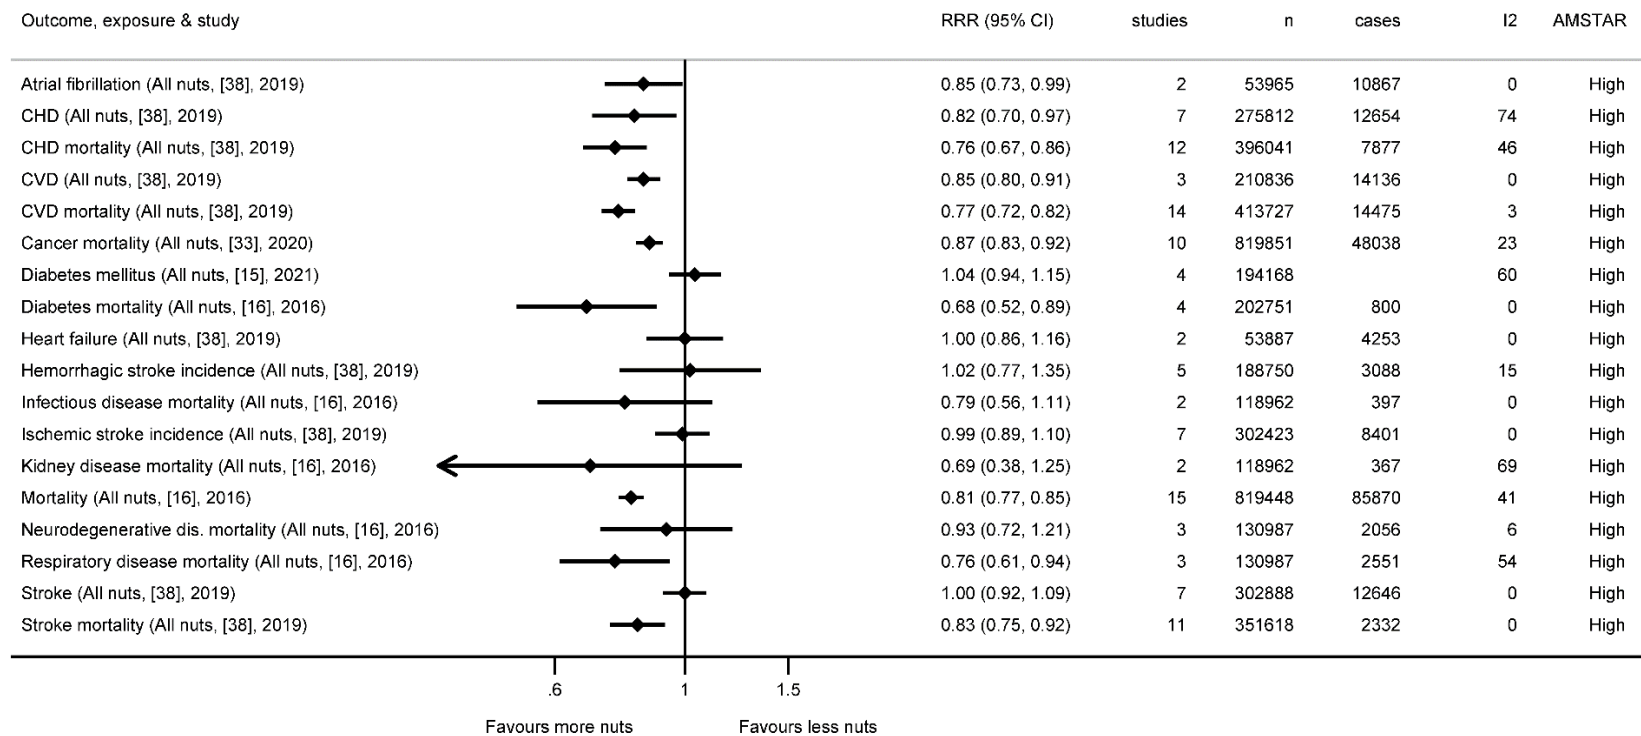

\* Abbreviations: CHD: coronary heart disease; CVD: cardiovascular disease

**Supplementary figure 2:** Summary of per serving associations from the most recent meta-analyses between consumption of 28g nuts and risk of various morbidities and mortalities. Reference number is listed in brackets and search year is listed within the parentheses.

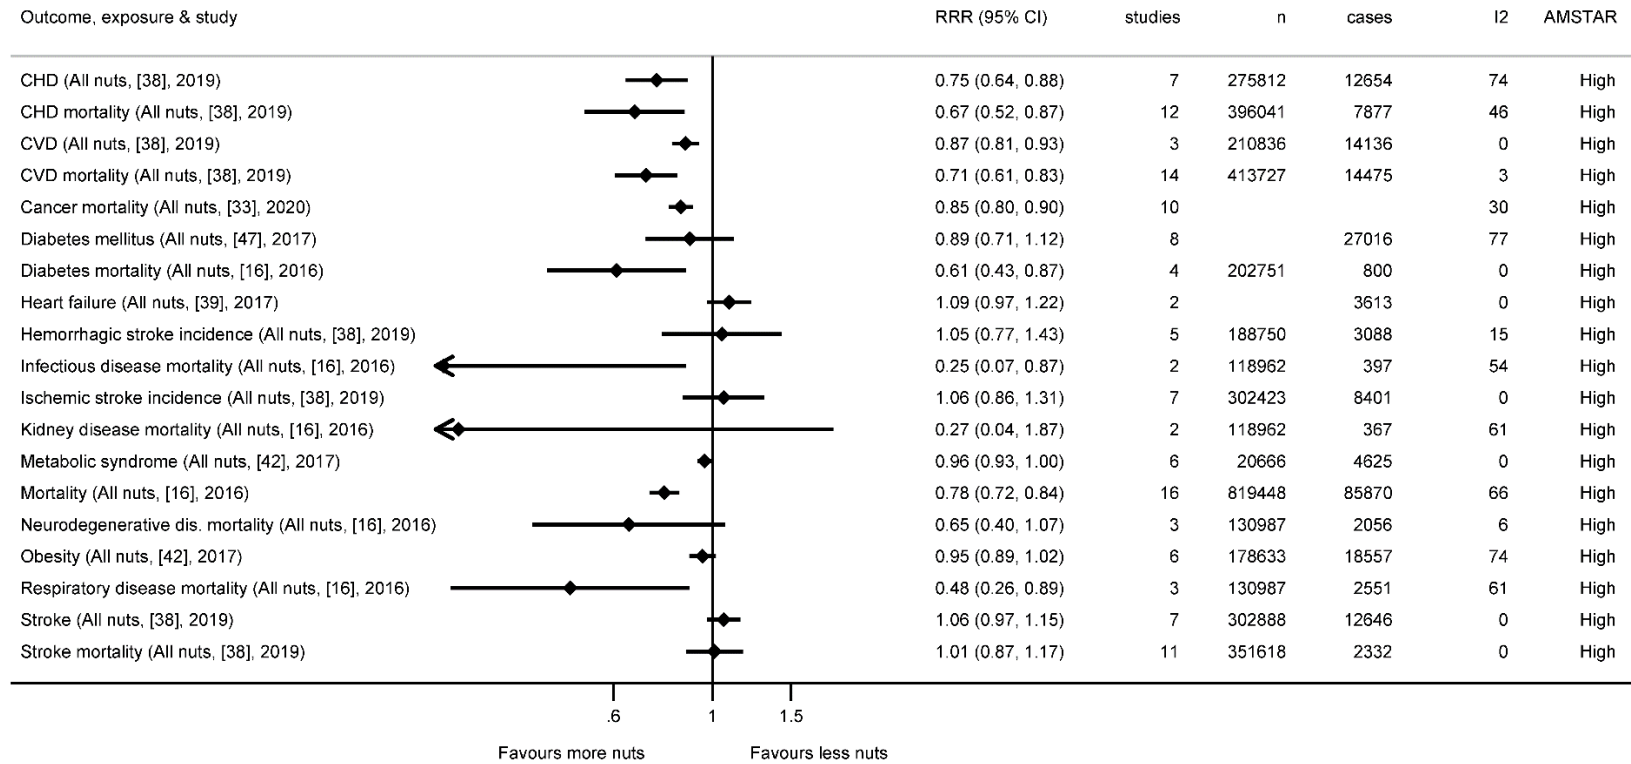

\* Abbreviations: CHD: coronary heart disease; CVD: cardiovascular disease

**Supplementary figure 3:** Summary of associations from meta-analyses between high compared to low consumption of nuts and risk of various cardiovascular morbidities and mortalities. Reference number is listed in brackets and search year is listed within the parentheses. Number of studies, participants (n) and cases, as well as heterogeneity ( $I^2$ ) is also listed in the right column.

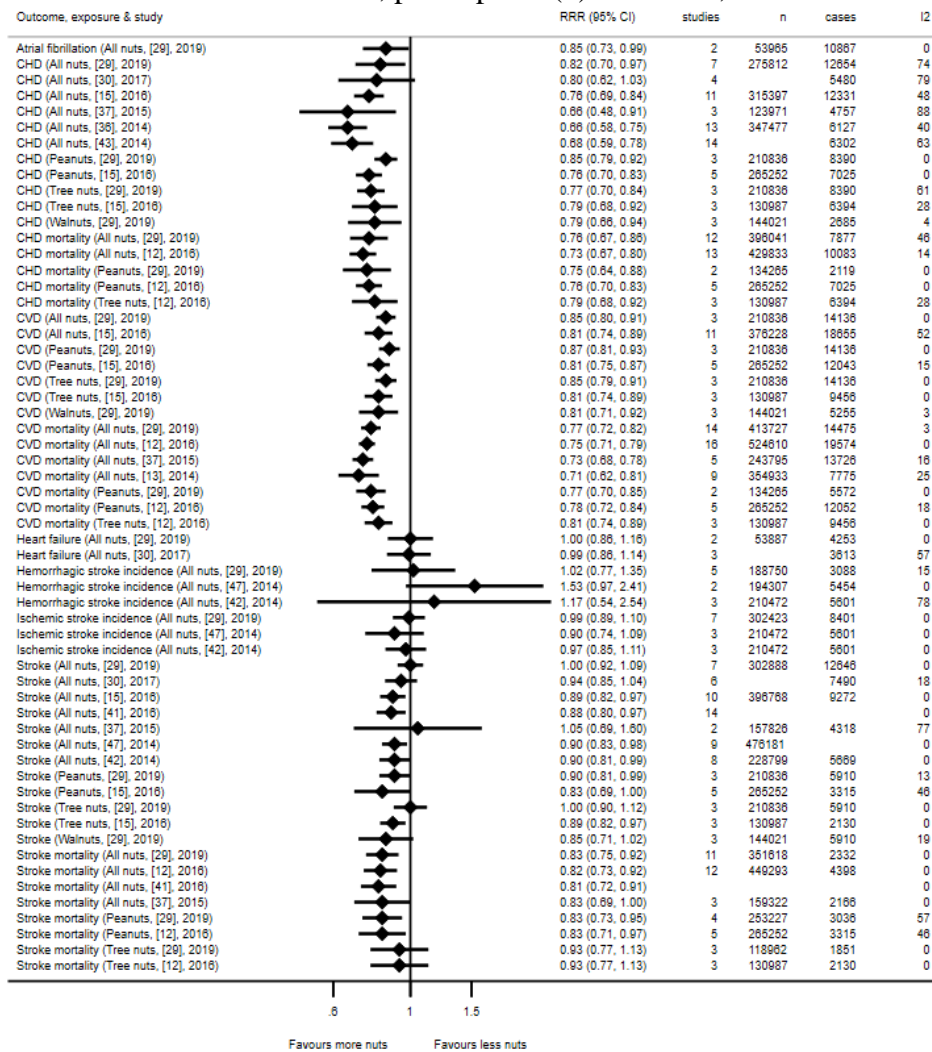

\* Abbreviations: CHD: coronary heart disease; CVD: cardiovascular disease

**Supplementary figure 4:** Summary of associations from meta-analyses between per serving of 28g consumption of nuts and risk of various cardiovascular morbidities and mortalities. Reference number is listed in brackets and search year is listed within the parentheses. Number of studies, participants (n) and cases, as well as heterogeneity ( $I^2$ ) is also listed in the right column.

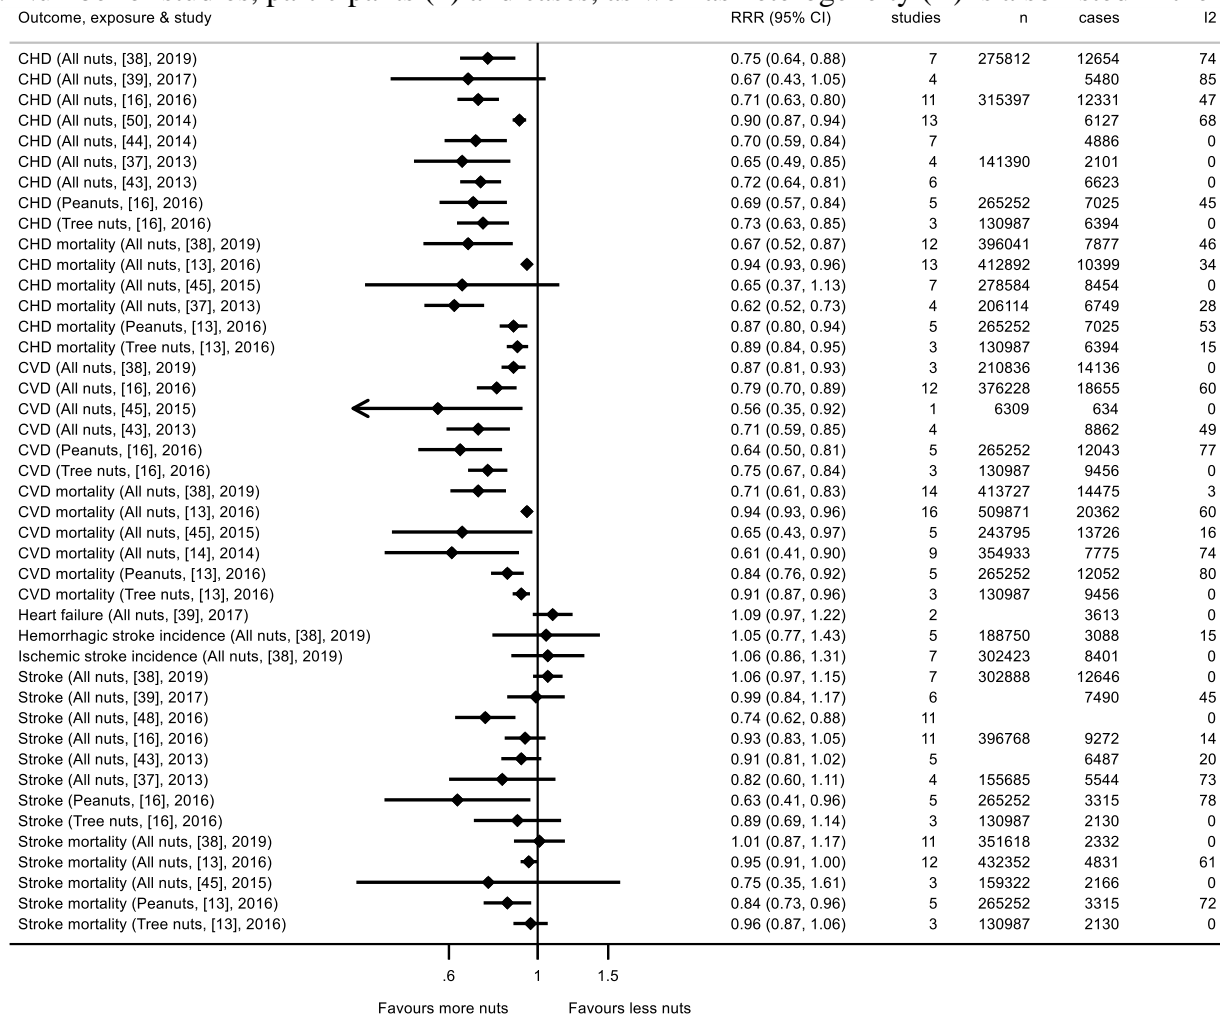

\* Abbreviations: CHD: coronary heart disease; CVD: cardiovascular disease

**Supplementary figure 5:** Summary of associations from meta-analyses between high compared to low consumption of nuts and risk of mortality. Reference number is listed in brackets and search year is listed within the parentheses. Number of studies, participants (n) and cases, as well as heterogeneity ( $I^2$ ) is also listed in the right column.

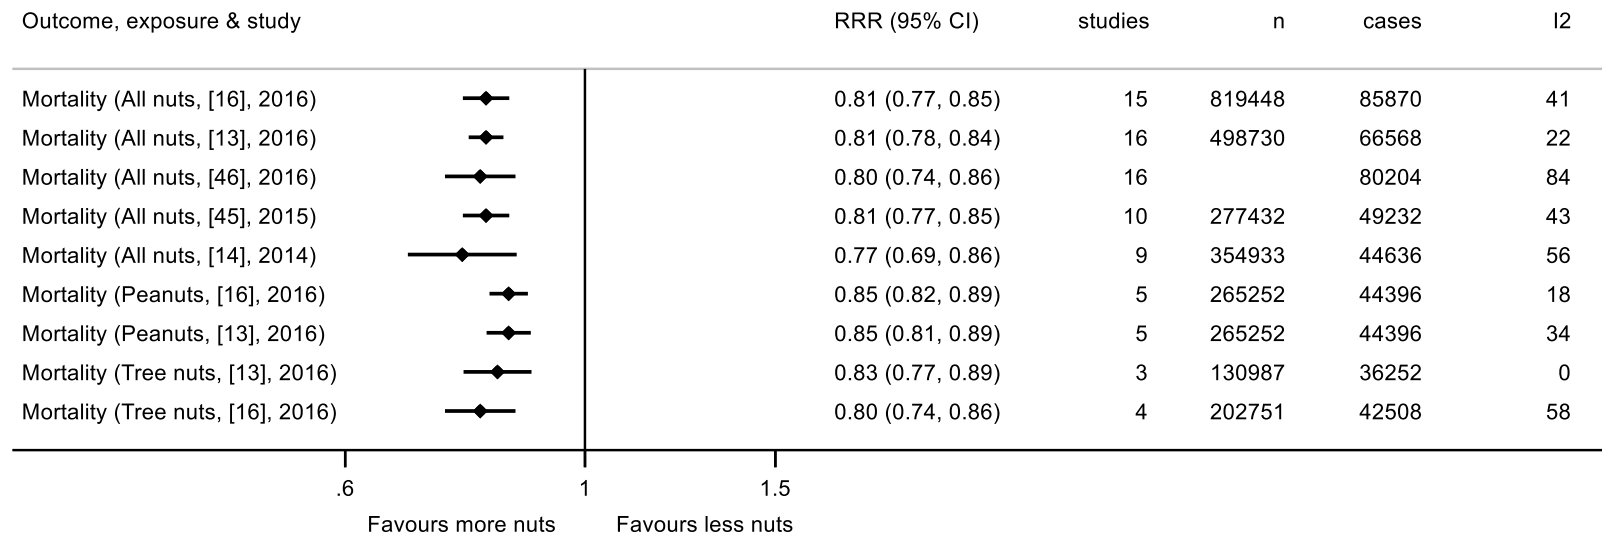

**Supplementary figure 6:** Summary of associations from meta-analyses between per serving of 28g consumption of nuts and risk of mortality. Reference number is listed in brackets and search year is listed within the parentheses. Number of studies, participants (n) and cases, as well as heterogeneity ( $I^2$ ) is also listed in the right column.

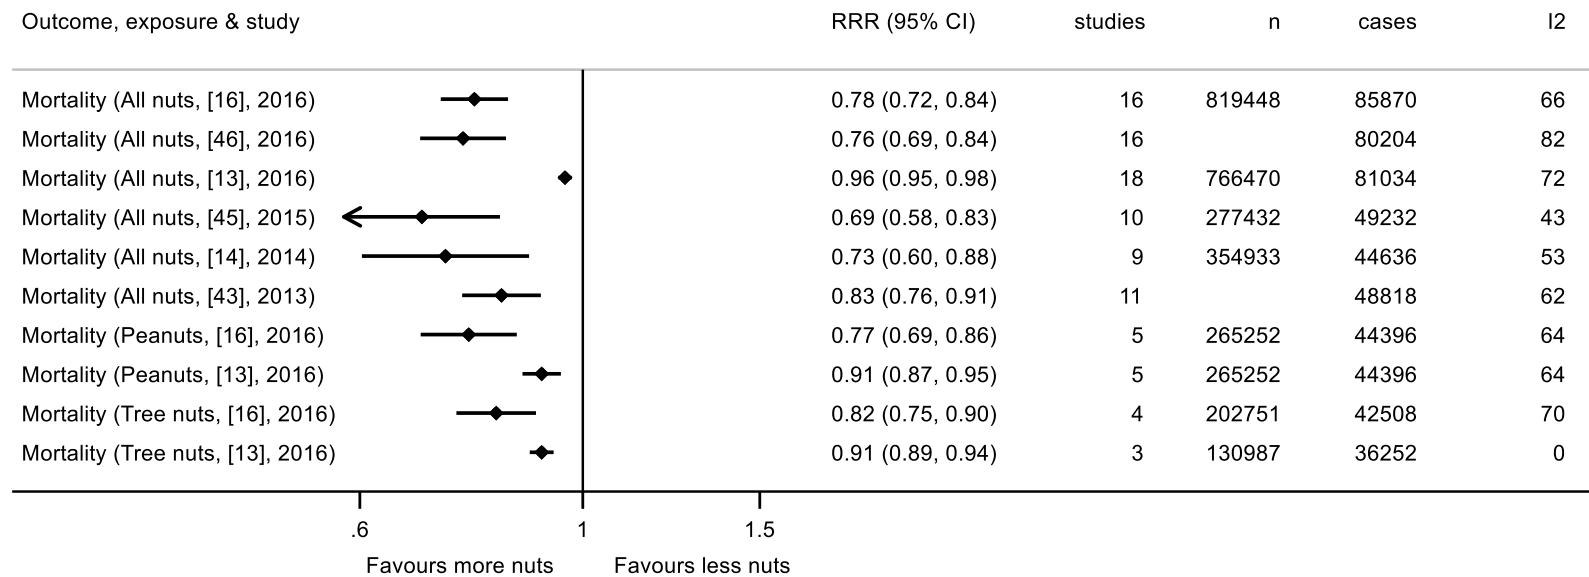

**Supplementary figure 7:** Summary of associations from meta-analyses between high compared to low consumption of nuts and risk of cancer and cancer-related mortality. Reference number is listed in brackets and search year is listed within the parentheses. Number of studies, participants (n) and cases, as well as heterogeneity ( $I^2$ ) is also listed in the right column.

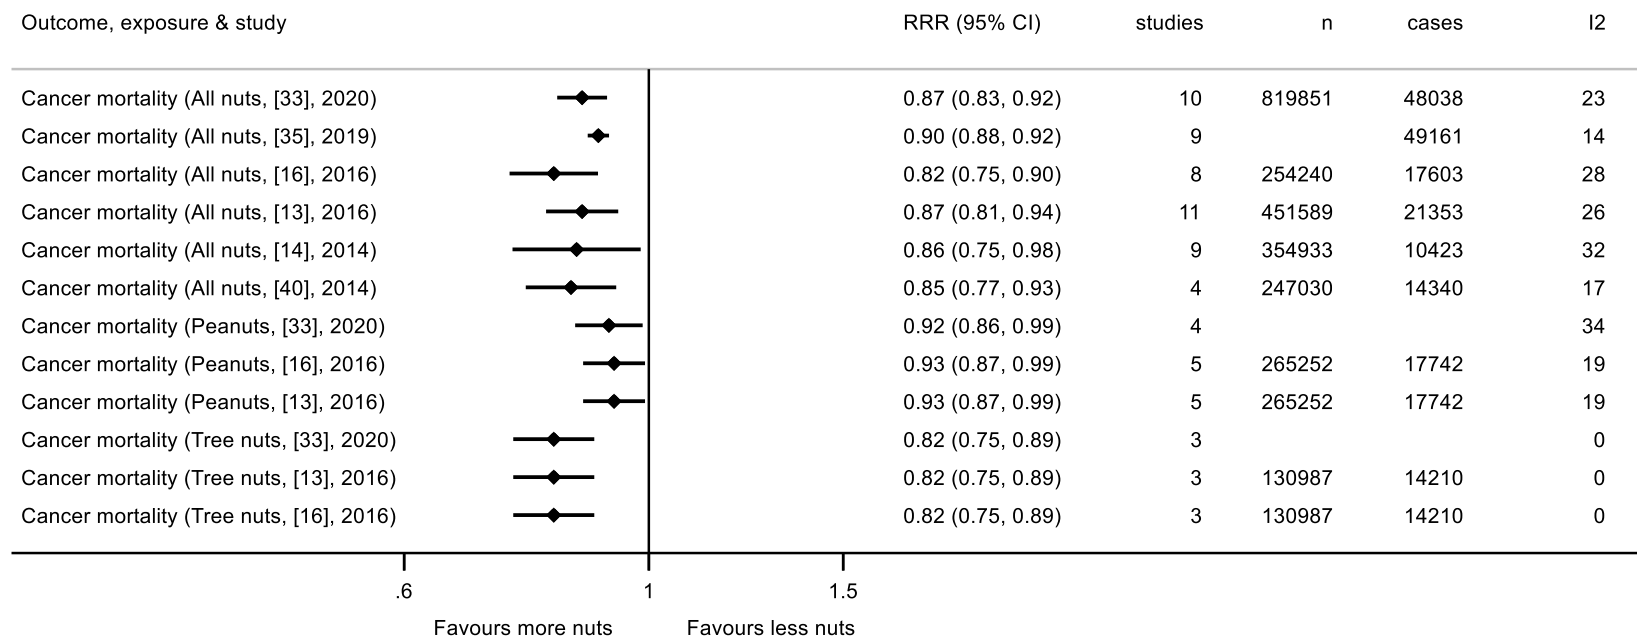



**Supplementary figure 8:** Summary of associations from meta-analyses between per serving of 28g consumption of nuts and risk of cancer and cancer-related mortality. Reference number is listed in brackets and search year is listed within the parentheses. Number of studies, participants (n) and cases, as well as heterogeneity ( $I^2$ ) is also listed in the right column.

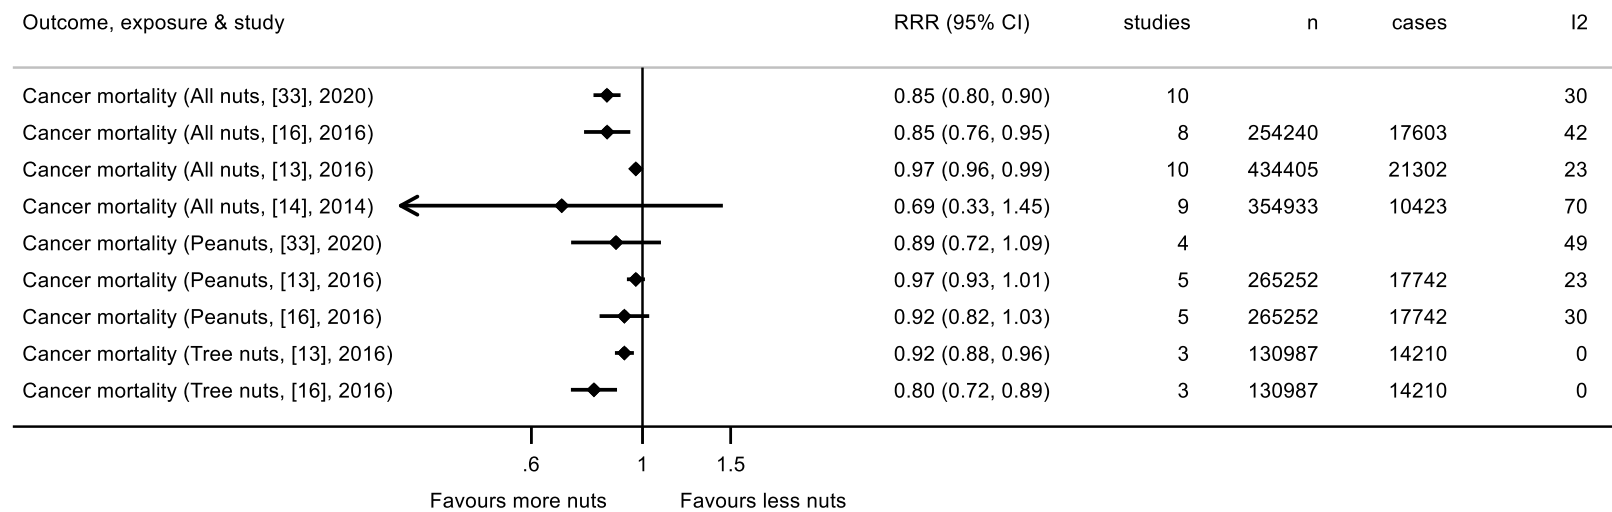

**Supplementary figure 9:** Summary of associations from meta-analyses between high compared to low consumption of nuts and risk of various diabetes-related morbidities and mortalities. Reference number is listed in brackets and search year is listed within the parentheses. Number of studies, participants (n) and cases, as well as heterogeneity ( $I^2$ ) is also listed in the right column.

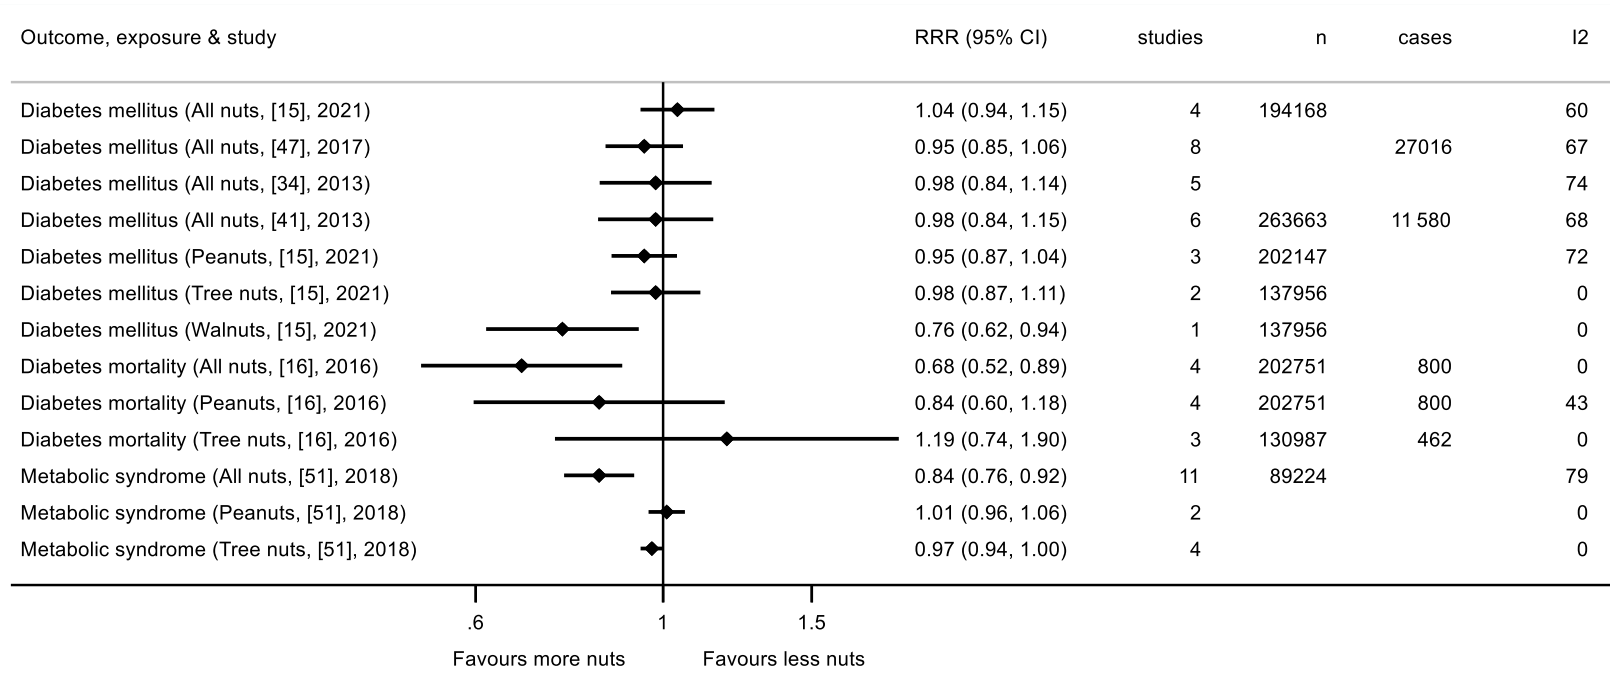

**Supplementary figure 10:** Summary of associations from meta-analyses between per serving of 28g consumption of nuts and risk of various diabetes-related morbidities and mortalities. Reference number is listed in brackets and search year is listed within the parentheses. Number of studies, participants (n) and cases, as well as heterogeneity ( $I^2$ ) is also listed in the right column.

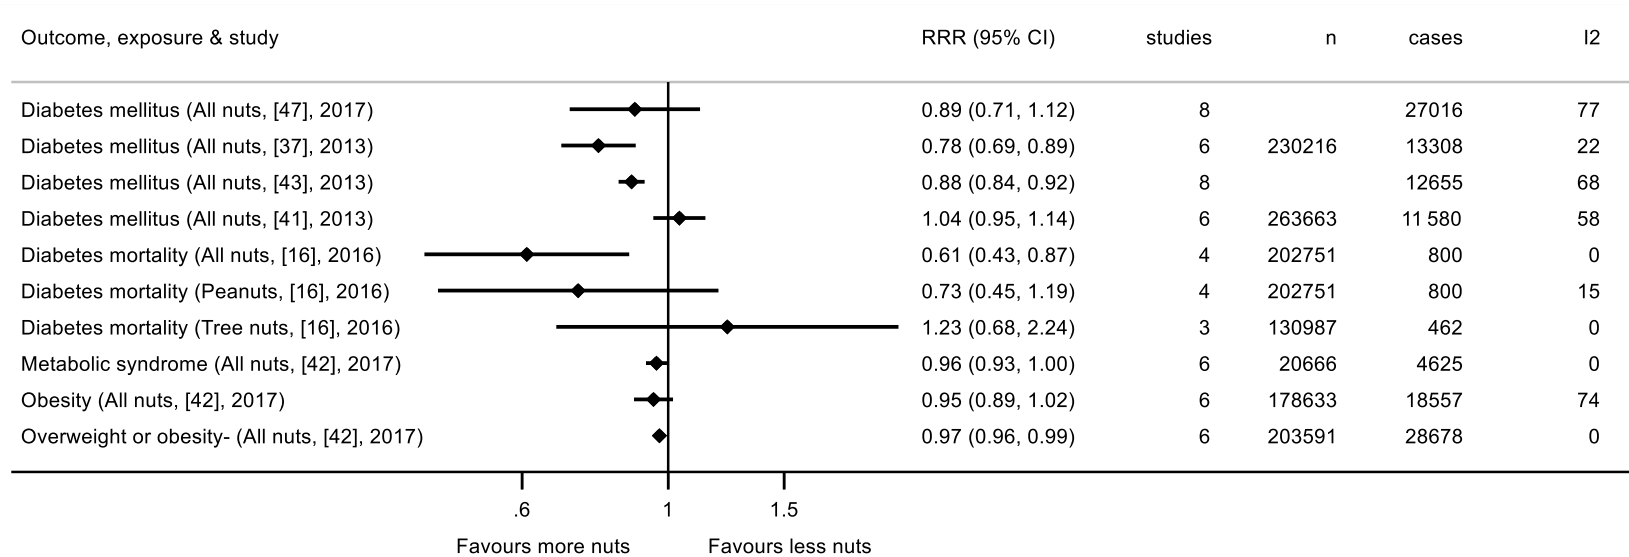

**Supplementary figure 11:** Summary of associations from meta-analyses between high compared to low consumption of nuts and risk of various other morbidities and mortalities. Reference number is listed in brackets and search year is listed within the parentheses. Number of studies, participants (n) and cases, as well as heterogeneity ( $I^2$ ) is also listed in the right column.

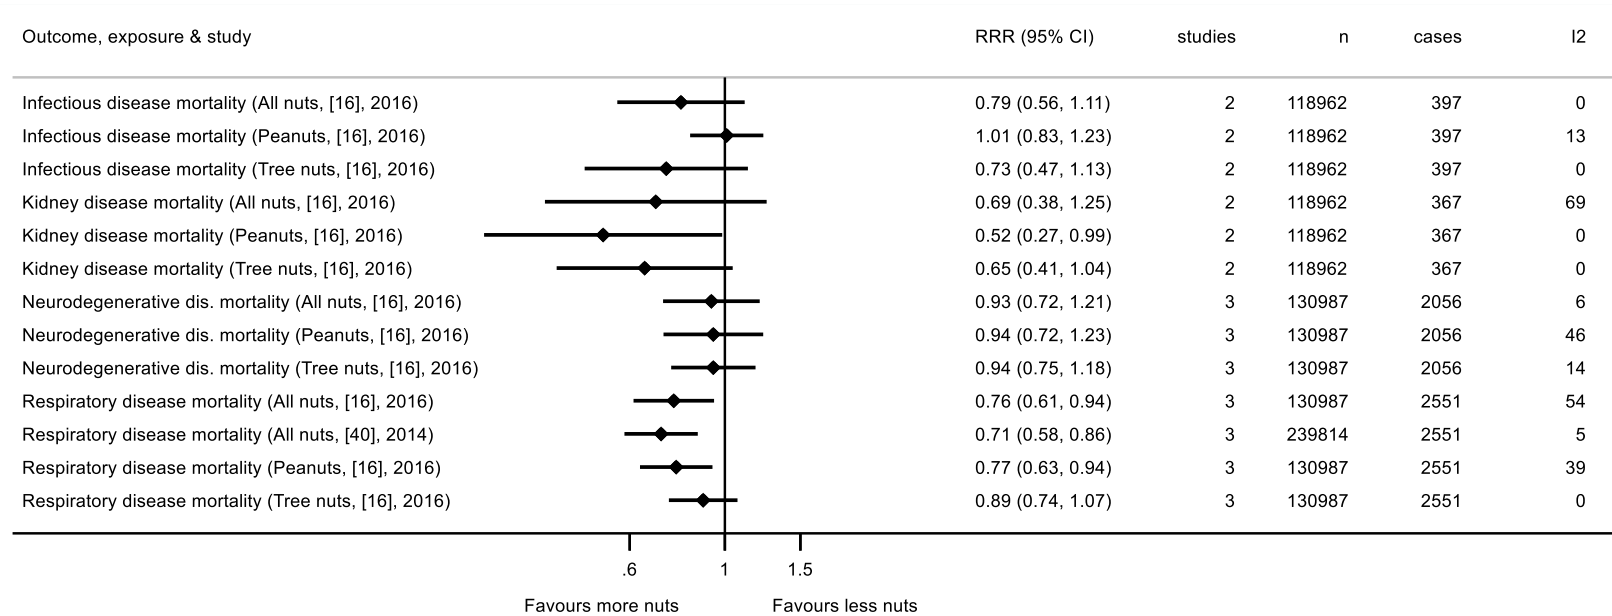

**Supplementary figure 12:** Summary of associations from meta-analyses between per serving of 28g consumption of nuts and risk of various other morbidities and mortalities. Reference number is listed in brackets and search year is listed within the parentheses. Number of studies, participants (n) and cases, as well as heterogeneity ( $I^2$ ) is also listed in the right column.

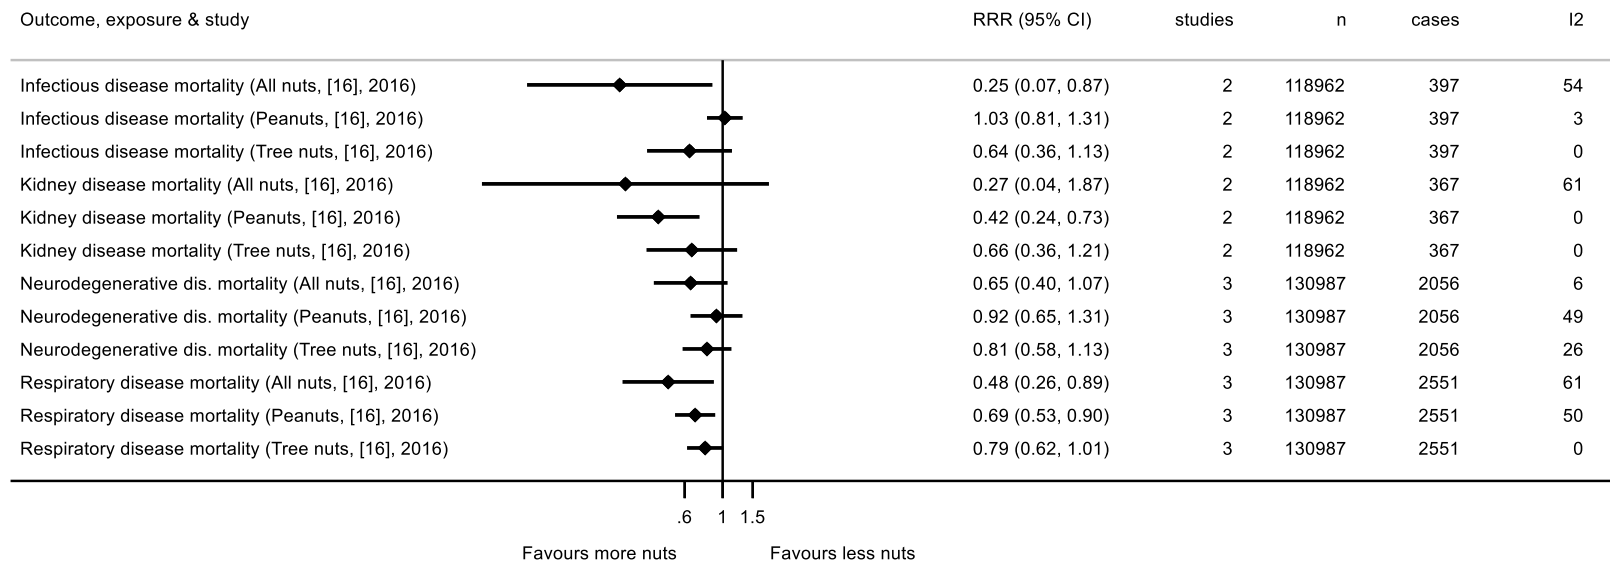

**Supplementary figure 13:** Summary of dose-response relationships from meta-analyses on associations between nut consumption of nuts and risk of cardiovascular diseases. The relationships are grouped by meta-analysis (labelled by first author). The meta-analysis by Aune et al. [16] is considered as most comprehensive. Reference numbers: Aune [16], Luo [43].

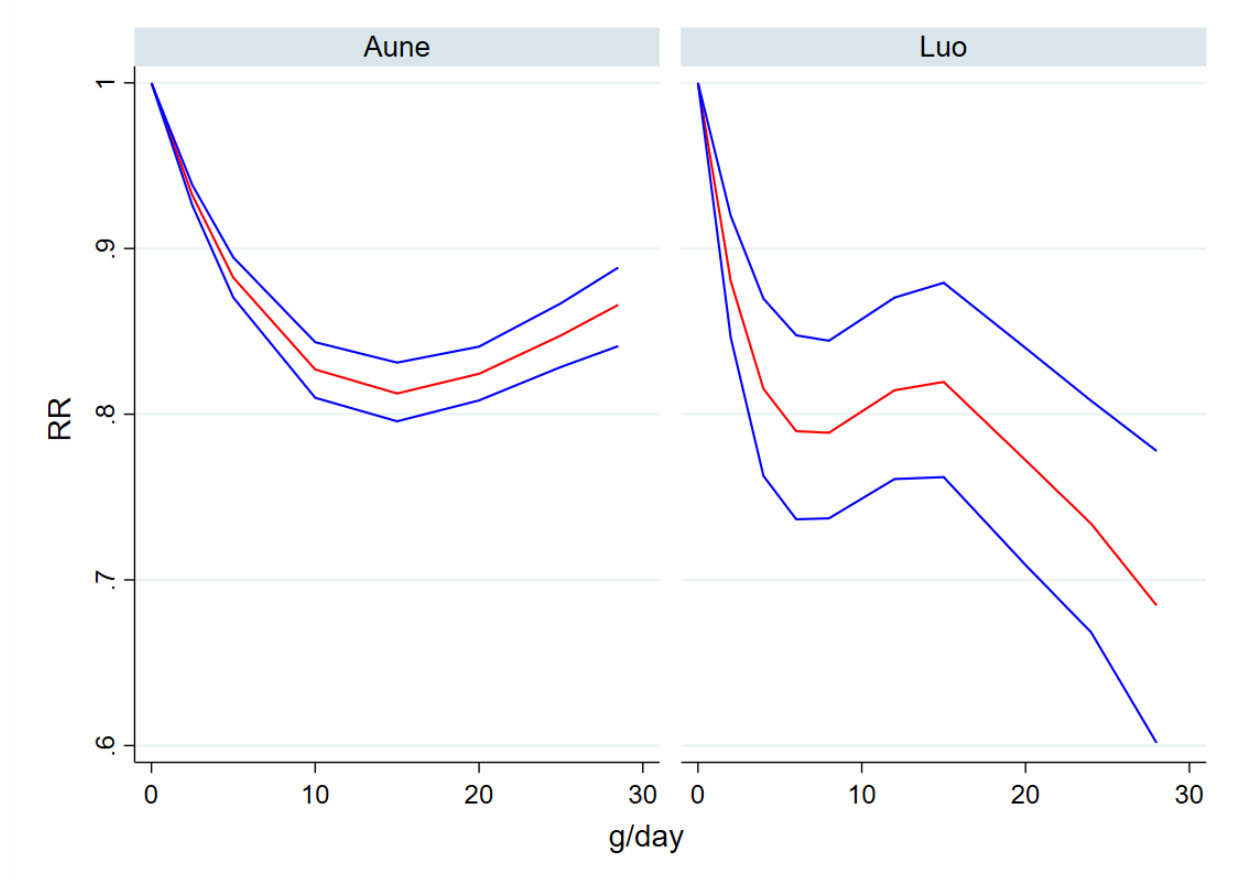

\* The red lines indicate the relative risk associations estimate while the blue lines represent the confidence interval of the relative risks

**Supplementary figure 14:** Summary of dose-response relationships from meta-analyses on associations between nut consumption of nuts and risk of coronary heart/artery disease. The relationships are grouped by meta-analysis (labelled by first author). The meta-analysis by Aune et al. [16] is considered as most comprehensive. Reference numbers: Aune [16], Bechthold [39], Ma [44].

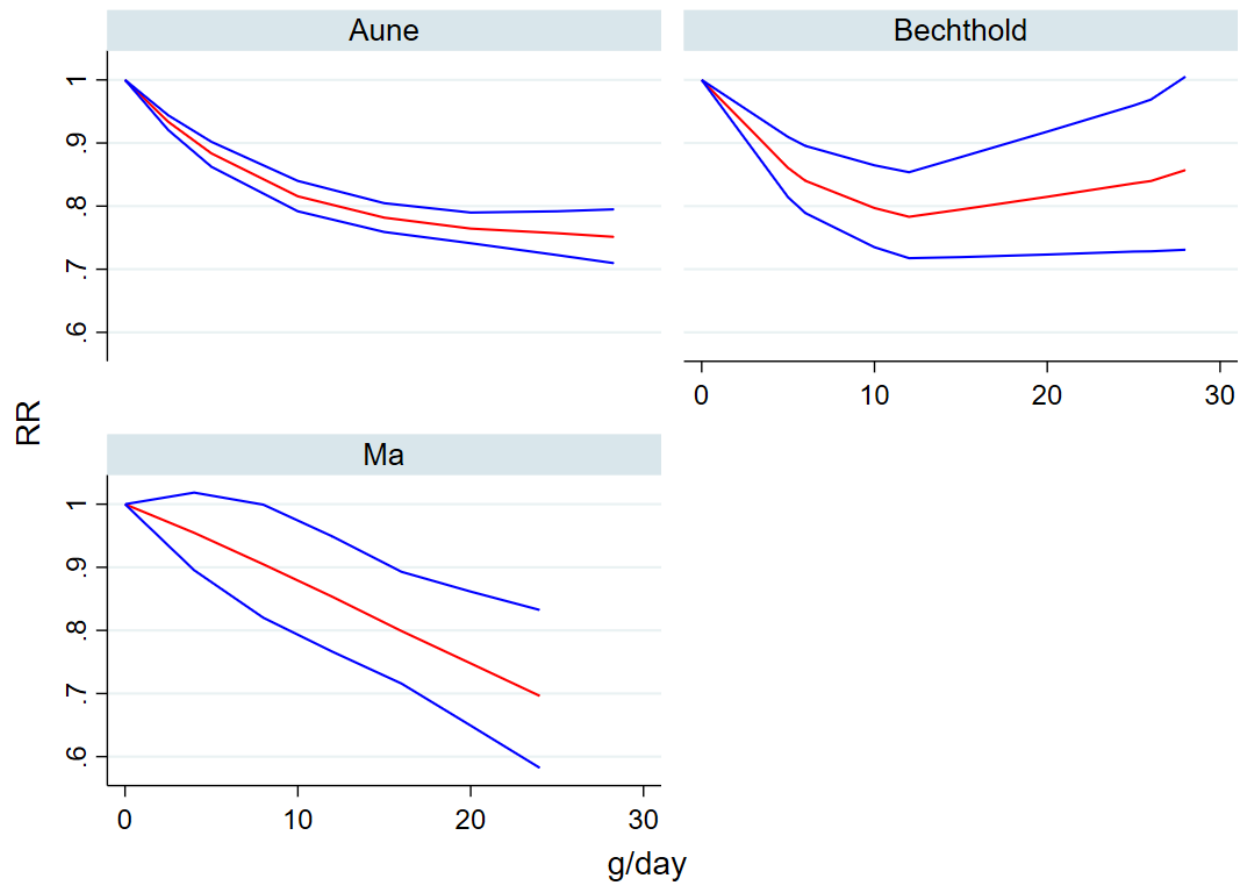

\* The red lines indicate the relative risk associations estimate while the blue lines represent the confidence interval of the relative risks

**Supplementary figure 15:** Summary of dose-response relationships from meta-analyses on associations between nut consumption of nuts and risk of stroke. The relationships are grouped by meta-analysis (labelled by first author). The meta-analysis by Aune et al. [16] is considered as most comprehensive. Reference numbers: Aune [16], Bechthold [39], Shao [48].

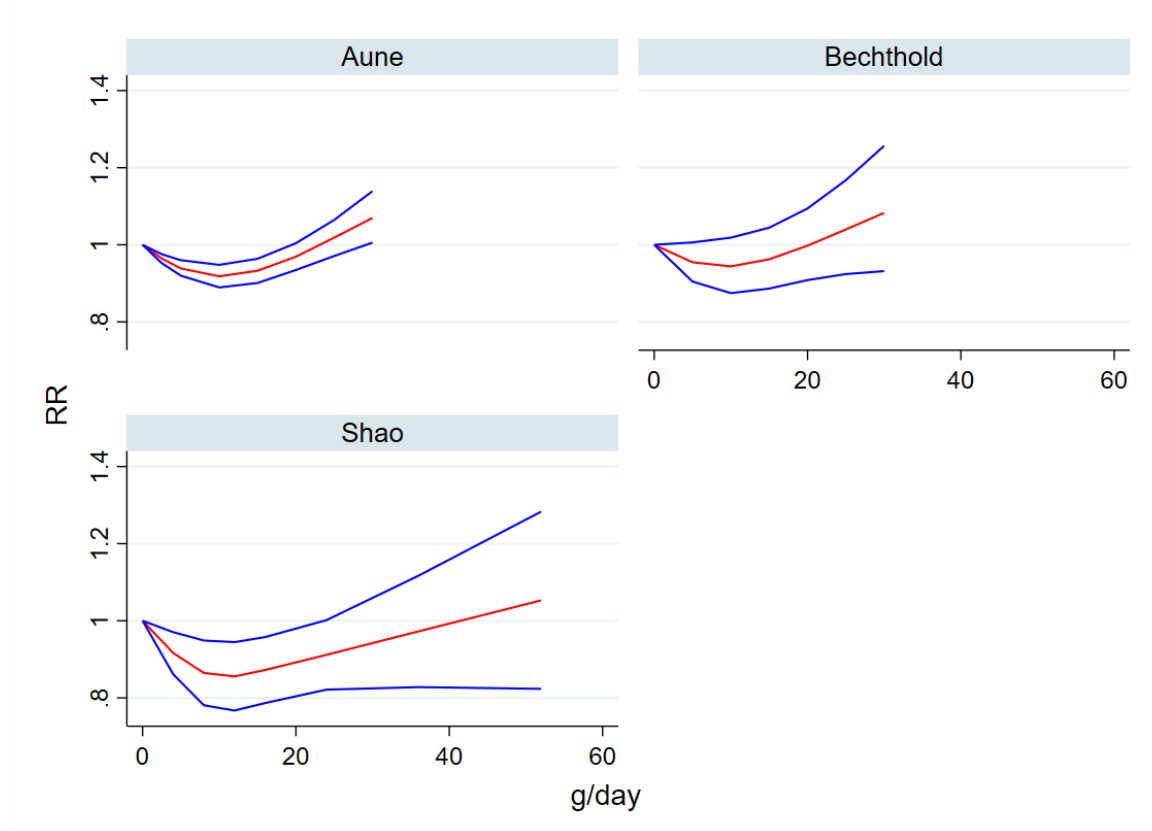

\* The red lines indicate the relative risk associations estimate while the blue lines represent the confidence interval of the relative risks



**Supplementary figure 16:** Summary of dose-response relationships from meta-analyses on associations between nut consumption of nuts and risk of diabetes. The relationships are grouped by meta-analysis (labelled by first author). The meta-analysis by Becerra-Tomás, et al. [15] is considered as most comprehensive. Reference numbers: Becerra-Tomás [15], Luo [43], Schwingshackl [47].

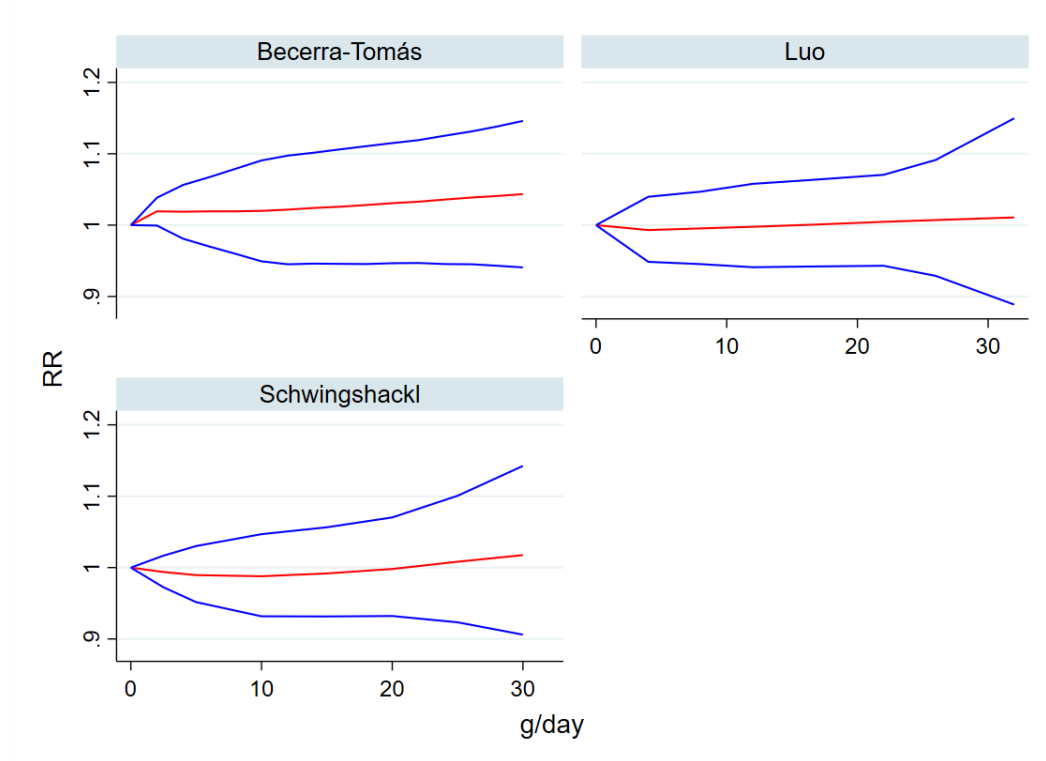

\* The red lines indicate the relative risk associations estimate while the blue lines represent the confidence interval of the relative risks

**Supplementary figure 17:** Summary of dose-response relationships from meta-analyses on associations between nut consumption of nuts and risk of cancer. The relationships are grouped by meta-analysis (labelled by first author). The meta-analysis by Aune et al. [16], is considered as most reliable. Reference numbers: Aune [16].

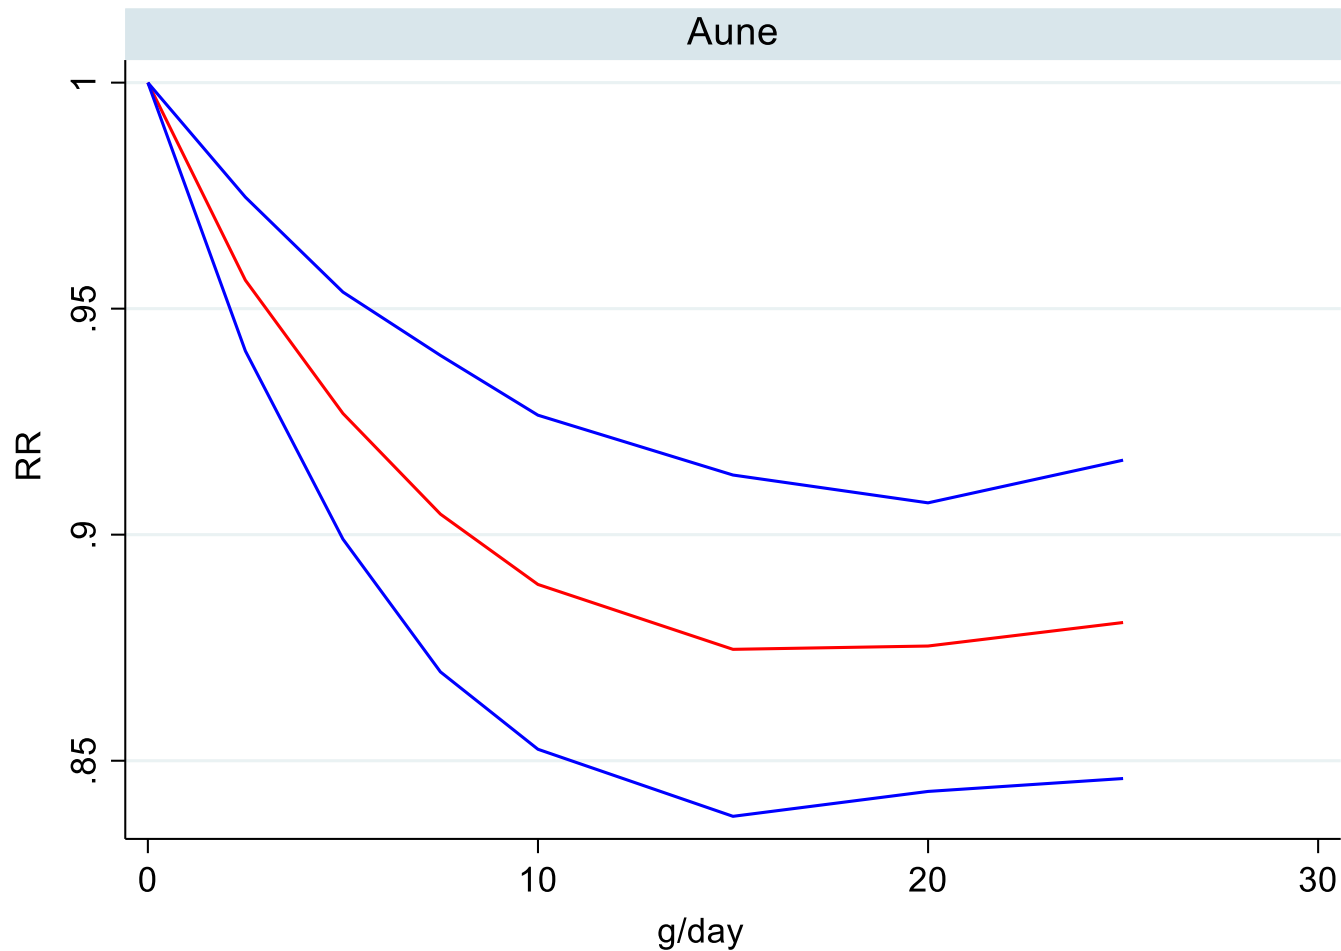

\* The red lines indicate the relative risk associations estimate while the blue lines represent the confidence interval of the relative risks

**Supplementary figure 18:** Summary of dose-response relationships from meta-analyses on associations between nut consumption of nuts and risk of mortality. The relationships are grouped by meta-analysis (labelled by first author). The meta-analysis by Aune et al. [16] is considered as most comprehensive. Reference numbers: Aune [16], Chen [13], Luo [43], Schwingshackl [46].

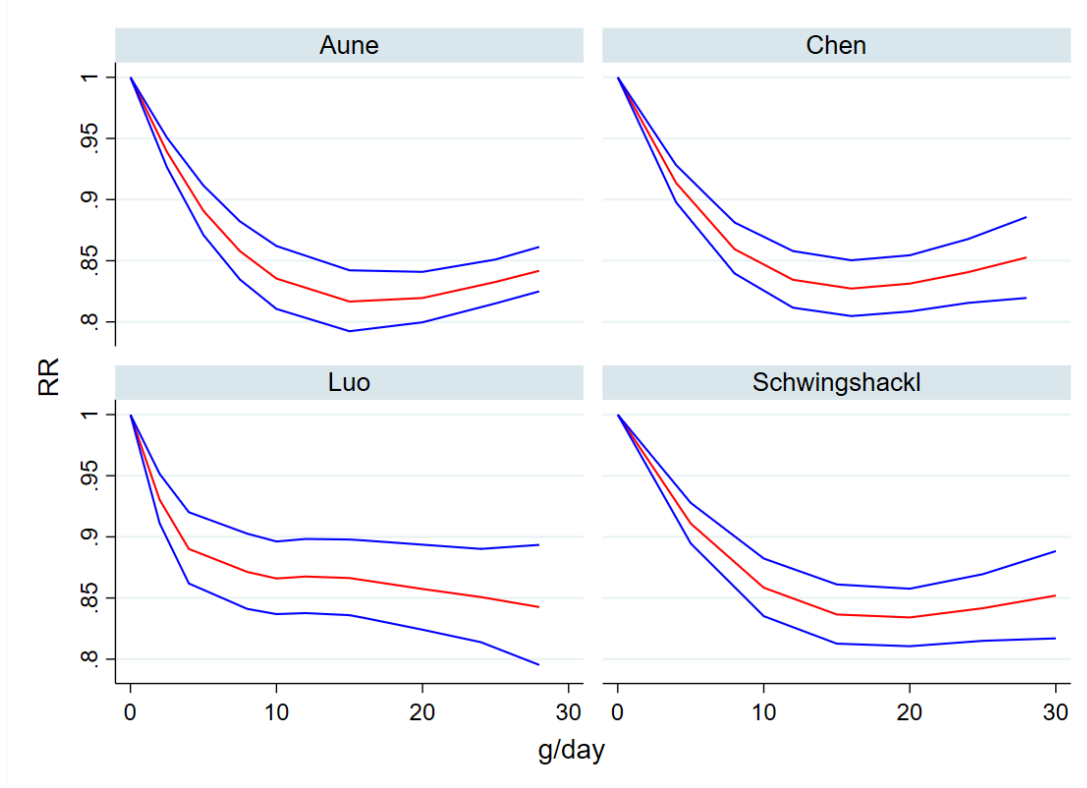

\* The red lines indicate the relative risk associations estimate while the blue lines represent the confidence interval of the relative risks

**Supplementary text 1:** Search documentation for literature search



## Search documentation for literature search 27.5.2021

Overall, 1546 records were retrieved in 4 databases. After automatic deduplication in EndNote, 1009 records remained. After manual deduplication, ? records remained.

### Epistemonikos:

The database seeks to import systematic reviews and higher level-syntheses from other databases, namely

- Cochrane Database of Systematic Reviews (CDSR) Last searched: May 27, 2021
- Pubmed Last searched: May 27, 2021
- EMBASE Last searched: May 25, 2021
- CINAHL (The Cumulative Index to Nursing and Allied Health Literature) Last searched: May 25, 2021
- PsycINFO Last searched: May 25, 2021
- LILACS (Literatura Latinoamericana y del Caribe en Ciencias de la Salud) Last searched: May 25, 2021
- Database of Abstracts of Reviews of Effects (DARE) Last searched: Aug 24, 2017 - No new records have been added to DARE after 2015
- The Campbell Collaboration online library Last searched: Nov 23, 2020
- JBI Database of Systematic Reviews and Implementation Reports Last searched: May 1, 2021
- EPPI-Centre Evidence Library Last searched: Mar 9, 2020

[\(read more\)](#)

The database does not contain a standardized vocabulary of subject headings, so the search was based on text words (with truncation used) in the title and abstract. There was only used one element in this search, i.e. nuts and seeds, as the database already filters for systematic reviews and other syntheses. The limitation to diet-related terms used in PubMed and Embase was omitted due to the lack of abstracts for many articles, which often would mention these terms.

The exported results include Epistemonikos' categories Systematic Review (521), Broad Synthesis (12) and Structured Summary (13). 546 results were retrieved and exported to EndNote.

### Search strategy:

```
(title:(nut OR nuts OR almond* OR cashew* OR hazelnut* OR macadamia* OR paranut* OR peanut* OR pistachio* OR walnut* OR pecan* OR hickory OR seeds OR sesame OR "pine seed" OR "sunflower seed" OR chia OR "poppy seed" OR poppyseed* OR "hemp seed" OR hempseed* OR quinoa OR "pumpkin seed" OR flaxseed OR "flax seed") OR abstract:(nut OR nuts OR almond* OR cashew* OR hazelnut* OR macadamia* OR paranut* OR peanut* OR pistachio* OR walnut* OR pecan* OR hickory OR seeds OR sesame OR "pine seed" OR "sunflower seed" OR chia OR "poppy seed" OR poppyseed* OR "hemp seed" OR hempseed* OR quinoa OR "pumpkin seed" OR flaxseed OR "flax seed"))
```

## PubMed (from inception to May 27 2021)

As the main element, a similar text word string for nuts and seeds was used as for Epistemonikos. The subject headings (MeSH) for nuts, seeds and individual species were added.

This element was combined with another set of text words and subject headings related to consumption, to limit the results to articles related to dietary use of nuts and seeds.

To limit the search to systematic reviews and meta-analyses, an adapted version of PubMed's subset for systematic reviews (systematic[sb]) and meta-analyses ("meta-analysis"[Publication Type]) was used. Several terms describing meta-analyses and systematic reviews have been added as text word search in title and abstract.

The search strategy was tested with 10 key articles, of which all were retrieved.

The search results (348) were exported to EndNote.

### Search strategy:

```
("nuts"[MeSH Terms] OR "seeds"[MeSH Terms:noexp] OR "macadamia"[MeSH Terms] OR "bertholletia"[MeSH Terms] OR "carya"[MeSH Terms] OR "nut"[Title/Abstract] OR "nuts"[Title/Abstract] OR "almond*" [Title/Abstract] OR "cashew*" [Title/Abstract] OR "hazelnut*" [Title/Abstract] OR "macadamia*" [Title/Abstract] OR "paranut*" [Title/Abstract] OR "peanut*" [Title/Abstract] OR "pistachio*" [Title/Abstract] OR "walnut*" [Title/Abstract] OR "pecan*" [Title/Abstract] OR "hickory" [Title/Abstract] OR "seeds" [Title/Abstract] OR "sesame" [Title/Abstract] OR "pine seed" [Title/Abstract] OR "sunflower seed" [Title/Abstract] OR "chia" [Title/Abstract] OR "poppy seed" [Title/Abstract] OR "poppseed*" [Title/Abstract] OR "hemp seed" [Title/Abstract] OR "hempseed*" [Title/Abstract] OR "quinoa" [Title/Abstract] OR "pumpkin seed" [Title/Abstract] OR "flaxseed*" [Title/Abstract] OR "flax seed" [Title/Abstract]) AND ("diet"[MeSH Terms] OR "eating"[MeSH Terms] OR "intake*" [Title/Abstract] OR "consum*" [Title/Abstract] OR "eating" [Title/Abstract] OR "eat" [Title/Abstract] OR "eats" [Title/Abstract] OR "diet*" [Title/Abstract]) AND (((("systematic review" [Title] OR "systematic literature review" [Title] OR "systematic scoping review" [Title] OR "systematic narrative review" [Title] OR "systematic qualitative review" [Title] OR "systematic evidence review" [Title] OR "systematic quantitative review" [Title] OR "systematic meta review" [Title] OR "systematic critical review" [Title] OR "systematic mixed studies review" [Title] OR "systematic mapping review" [Title] OR "systematic cochrane review" [Title] OR "systematic search and review" [Title] OR "systematic integrative review" [Title]) NOT "comment" [Publication Type]) NOT ("protocol" [Title] OR "protocols" [Title])) NOT "MEDLINE" [Filter]) OR ("cochrane database syst rev" [Journal] AND "review" [Publication Type]) OR "systematic review" [Publication Type] OR "meta-analysis" [Publication Type] OR "meta-analysis as topic" [MeSH Terms] OR "meta analy*" [Title/Abstract] OR "meta analy*" [Title/Abstract] OR "metanaly*" [Title/Abstract] OR "metaanaly*" [Title/Abstract] OR "met analy*" [Title/Abstract] OR "integrative review*" [Title/Abstract] OR "integrative overview*" [Title/Abstract] OR "collaborative review*" [Title/Abstract] OR "collaborative overview*" [Title/Abstract] OR "systematic review*" [Title/Abstract] OR "systematic overview*" [Title/Abstract])
```

## **Cochrane Database of Systematic Reviews (Issue 5 of 12, May 2021)**

A similar text word search string for nuts and seeds was used as for the other databases. Text word search was performed for the fields title, abstract and keywords. Additionally, MeSH terms for nuts and seeds were used.

29 systematic reviews were retrieved and exported to EndNote.

### **Search strategy:**

- #1 (nut OR nuts OR almond\* OR cashew\* OR hazelnut\* OR macadamia\* OR peanut\* OR pistachio\* OR walnut\* OR pecan\* OR hickory OR seeds OR sesame OR "pine seed" OR "sunflower seed" OR chia OR "poppy seed" OR poppyseed\* OR "hemp seed" OR quinoa OR "pumpkin seed" OR flaxseed\* OR "flax seed"):ti,ab,kw
- #2 MeSH descriptor: [Seeds] explode all trees
- #3 MeSH descriptor: [Nuts] explode all trees
- #4 MeSH descriptor: [Macadamia] explode all trees
- #5 MeSH descriptor: [Bertholletia] explode all trees
- #6 MeSH descriptor: [Carya] explode all trees
- #7 #1 OR #2 OR #3 OR #4 OR #5 OR #6



**Embase:**

The main element included the same text word string for nuts and seeds as for Epistemonikos, PubMed and Cochrane. Subject headings (Emtree) for nuts, seeds and individual species were added.

This element was combined with another set of text words and subject headings related to consumption, to limit the results to articles related to dietary use of nuts and seeds.

All text word searches were applied to the search fields title, abstract and keywords.

To limit the search to systematic reviews and meta-analyses, the filter used for the search in PubMed was translated to Embase (Ovid).

The search results (623) were exported to EndNote.

**Search strategy:**

- 1 nut/ or almond/ or brazil nut/ or cashew nut/ or hazelnut/ or pecan/ or pistachio nut/ or walnut/ or peanut/ or macadamia/ or sesame/ or exp pseudocereal/ or exp oilseed/
- 2 (nut or nuts or almond\* or cashew\* or hazelnut\* or macadamia\* or peanut\* or pistachio\* or walnut\* or pecan\* or hickory or seeds or sesame or "pine seed" or "sunflower seed" or chia or "poppy seed" or poppyseed\* or "hemp seed" or quinoa or "pumpkin seed" or flaxseed\* or "flax seed").ti,ab,kw.
- 3 1 or 2
- 4 exp food intake/
- 5 (intake\* or consum\* or eat\* or diet\*).ti,ab,kw.
- 6 4 or 5
- 7 "systematic review"/ or meta analysis/ or "meta analysis (topic)"/ or "systematic review (topic)"/
- 8 ((systematic\* adj3 (review\* or overview\*)) or (integrative adj3 (review\* or overview\*)) or (collaborative adj3 (review\* or overview\*)) or (met analy\* or metanaly\* or meta-analy\* or metaanaly\* or systematic review\*)).ti,ab,kw.
- 9 7 or 8
- 10 3 and 6 and 9
